# Supplementary material
Source: publisher figshare collection journal article supplement (https://acs.figshare.com/ndownloader/files/4501828)

# **A Convergent Stereoselective Synthesis of Quinolizidines and Indolizidines: Chemoselective Coupling of 2-Hydroxymethyl Substituted Allylic Silanes with Imines**

Dexi Yang and Glenn C. Micalizio\*

Department of Chemistry, The Scripps Research Institute, Scripps Florida, Jupiter, Florida 33458

## **Supporting Information**

**General Information:**  $^1\text{H}$  NMR data were recorded at 400 MHz on a Bruker AM-400 in  $\text{CD}_3\text{Cl}$  or  $\text{CD}_2\text{Cl}_2$ .  $^{13}\text{C}$  NMR data were recorded at 100 MHz on a Bruker AM-400. Infrared spectra were recorded on a PerkinElmer SpectrumOne FT-IR instrument. Low resolution mass spectra were acquired on a Varian 500-MS mass spectrometer under soft ionization mode. HRMS data (ESI-TOF-MS) were obtained by the University of Florida Mass Spectrometry lab.

Diethyl ether, tetrahydrofuran, and dichloromethane were dried over activated alumina columns and sparged with argon prior to use.  $\text{Ti}(\text{O}i\text{-Pr})_4$  (Aldrich, 97%) was distilled prior to use (69-70 °C, < 1 Torr). Butyllithium and  $c\text{-C}_5\text{H}_9\text{MgCl}$  (Aldrich) were titrated by the method of Love et al.<sup>1</sup> Allylsilanes **6**, **8**, **10**, **12** were prepared according to Trost.<sup>2</sup> Imines **14**, **17**, **20**, **23**, **26**, **29** were prepared according to Jacobsen.<sup>3</sup> Imines **14**, **17**, **20** were purified by vacuum distillation (< 1 Torr). Imines **23**, **26**, **29** were used without any purification.

All reactions were conducted in flame-dried glass flasks under an argon atmosphere unless otherwise specified. Flash column chromatography was performed using Silicycle SiliaFlash P60 silica gel, 40-63  $\mu\text{m}$  particle size.

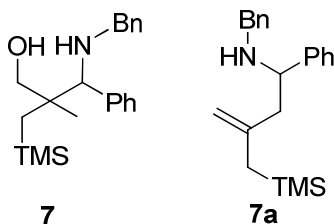

**3-(benzylamino)-2-methyl-3-phenyl-2-((trimethylsilyl)methyl)propan-1-ol (7) and N-benzyl-1-phenyl-3-((trimethylsilyl)methyl)but-3-en-1-amine (7a):** To a solution of 262 mg (1.33 mmol) of imine **5** in 6 mL of dry diethyl ether was added 0.61 mL (2.0 mmol) of  $\text{Ti}(\text{O}^i\text{Pr})_4$  via a syringe at rt under argon. After stirring for 10 min, the solution was cooled to  $-78^\circ\text{C}$ , and 2.0 mL (4.0 mmol) of 2.0 M  $\text{c-C}_5\text{H}_9\text{MgCl}$  in diethyl ether was added via a syringe over 2 min. The solution turned from yellow to dark brown after stirring at  $-78^\circ\text{C}$  for 1.5 h. Next, a solution of the lithium alkoxide of alcohol **6** in 2 mL of THF, prepared by deprotonation of 0.28 g (2.0 mmol) of alcohol **6** at  $-78^\circ\text{C}$  with 0.88 mL (2.2 mmol) of 2.5 M  $n\text{-BuLi}$  in hexanes followed by 10 min stirring, was added to the brown solution via cannula. The mixture was warmed to room temperature over 2 h, then stirred for 12 h. The reaction was quenched by sequential addition of 10 mL of ethyl ether and 5 mL of saturated aqueous  $\text{NaHCO}_3$ , followed by vigorous stirring for 1 h. The aqueous phase was separated and extracted with 2 portions of 10 mL of ether. The organic extracts were combined, dried ( $\text{MgSO}_4$ ), and concentrated *in vacuo* to afford a pale yellow oil. The residue was purified by chromatography over 30 g of silica gel (hexanes-ethyl acetate, 10:1) to give 320 mg (75%) of amines **7** (a mixture of inseparable diastereomers) and 80 mg (19%) of homoallylic amine **7a** as colorless oils.

Data for amines **7**: IR (neat) 3307, 2853, 1644, 1454  $\text{cm}^{-1}$ ;  $^1\text{H}$  NMR ( $\text{CDCl}_3$ , 400 MHz)  $\delta$  0.00 (s, 9H, TMS), 0.43 and 0.96 (ABq,  $J = 14.0$  Hz, 2H,  $\text{CH}_2\text{TMS}$ ), 3.42 and 3.54 (ABq,  $J = 12.8$  Hz, 2H,  $\text{CH}_2\text{OH}$ ), 3.56 (s, 3H, 1H,  $\text{CH}_2\text{CHNCH}_2\text{Ph}$ ), 7.30 (m, 10H, benzene);  $^{13}\text{C}$  NMR ( $\text{CDCl}_3$ , 100 MHz)  $\delta$  0.0 (q), 17.6 (t), 23.1 (q), 40.2 (s), 50.6 (t), 72.7 (d), 72.8 (t), 126.4 (d), 127.1 (d), 127.5 (d), 127.6 (d), 138.2 (s), 138.3 (s); LRMS  $\text{C}_{21}\text{H}_{31}\text{NOSi} + \text{H}^+$  calcd.  $m/z$  342.2, found  $m/z$  342.6.

Data for amine **7a**: IR (neat) 2235, 2953, 1632, 1494  $\text{cm}^{-1}$ ;  $^1\text{H}$  NMR ( $\text{CDCl}_3$ , 400 MHz)  $\delta$  0.00 (s, 9H, TMS), 1.40 and 1.51 (ABq,  $J = 13.2$  Hz, 2H,  $\text{CH}_2\text{TMS}$ ), 1.81 (br, 1H, NH), 2.26 (m, 2H,  $\text{CH}_2\text{CHN}$ ), 3.48 and 3.70 (ABq,  $J = 12.0$  Hz, 2H,  $\text{NCH}_2\text{Ph}$ ), 3.77 (dd,  $J = 9.2, 4.8$  Hz, 1H,  $\text{CH}_2\text{CHN}$ ), 4.62 (s, 1H,  $=\text{CH}_2$ ), 4.68 (s, 1H,  $=\text{CH}_2$ ), 7.35 (m, 10H, benzene); LRMS  $\text{C}_{21}\text{H}_{29}\text{NSi} + \text{H}^+$  calcd.  $m/z$  324.2, found  $m/z$  324.5.

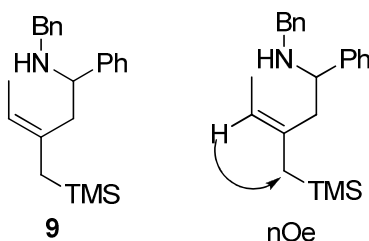

**(E)-N-benzyl-1-phenyl-3-((trimethylsilyl)methyl)pent-3-en-1-amine (9):** To a solution of 260mg (1.33 mmol) of imine **5** in 6 mL of dry diethyl ether was added 0.61 mL (2.0 mmol) of  $\text{Ti}(\text{O}^i\text{Pr})_4$  via a syringe at rt under argon. After stirring for 10 min, the solution was cooled to  $-78^\circ\text{C}$ , and 2.0 mL (4.0 mmol) of 2.0 M  $n\text{-C}_5\text{H}_9\text{MgCl}$  in diethyl ether was added via a syringe over 2 min. The solution turned from yellow to dark brown after stirring at  $-78^\circ\text{C}$  for 1.5 h. Next, a solution of lithium alkoxide of alcohol **8** in 2 mL of THF, prepared by deprotonation of 0.30 g (2.0 mmol) of alcohol **8** at  $-78^\circ\text{C}$  with 0.85 mL (2.13 mmol) of 2.5 M  $n\text{-BuLi}$  in hexanes followed by 10 min stirring, was added to the brown solution via cannula. The mixture was warmed to room temperature over 2 h, then stirred for 12 h. The reaction was quenched by sequential addition of 10 mL of ethyl ether and 5 mL of saturated aqueous  $\text{NaHCO}_3$ , followed by vigorous stirring for 1 h. The aqueous phase was separated and extracted with 2 portions of 10 mL of ether. The organic extracts were combined, dried ( $\text{MgSO}_4$ ), and concentrated *in vacuo* to afford a pale yellow oil. The residue was purified by chromatography over 30 g of silica gel (hexanes-ethyl acetate, 10:1) to give 320 mg (70%) of homoallylic amine **9** as a colorless oil. No evidence for the production of a minor isomer was found in the  $^1\text{H}$  NMR of the crude material. Alkene geometry was determined by nOe. Data for amine **9**: IR (neat) 3584, 2953, 1652, 1454  $\text{cm}^{-1}$ ;  $^1\text{H}$  NMR ( $\text{CDCl}_3$ , 400 MHz)  $\delta$  0.00 (s, 9H, TMS),

1.35 and 1.43 (d,  $J = 13.6$  Hz, 2H,  $\text{CH}_2\text{TMS}$ ), 1.57 (d,  $J = 6.4$  Hz, 3H,  $=\text{CHCH}_3$ ), 1.82 (br, 1H, NH), 2.13 (dd,  $J = 13.6, 5.2$  Hz, 1H,  $\text{CH}_2\text{CHN}$ ), 2.56 (dd,  $J = 13.2, 9.2$  Hz, 1H,  $\text{CH}_2\text{CHN}$ ), 3.52 and 3.73 (ABq,  $J = 13.6$  Hz, 2H,  $\text{NCH}_2\text{Ph}$ ), 3.81 (dd,  $J = 9.2, 5.2$  Hz, 1H,  $\text{CH}_2\text{CHN}$ ), 5.19 (q,  $J = 6.4$  Hz, 1H,  $=\text{CHCH}_3$ ), 7.36 (m, 10H, benzene);  $^{13}\text{C}$  NMR ( $\text{CDCl}_3$ , 100 MHz)  $\delta$  0.0 (q), 14.8 (q), 27.8 (t), 42.4 (t), 52.7 (t), 61.5 (d), 121.2 (d), 127.9 (d), 128.1 (d), 128.5 (d), 129.1 (d), 129.45 (d), 129.49 (d), 129.54 (d), 135.4 (s), 141.8 (s), 145.4 (s); LRMS  $\text{C}_{22}\text{H}_{31}\text{NSi} + \text{H}^+$  calcd.  $m/z$  338.2, found  $m/z$  338.5.

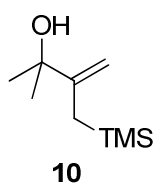

**2-methyl-3-((trimethylsilyl)methyl)but-3-en-2-ol (10):** IR (neat) 3401, 3093, 2976, 1628, 1461  $\text{cm}^{-1}$ ;  $^1\text{H}$  NMR ( $\text{CDCl}_3$ , 400 MHz)  $\delta$  0.05 (s, 9H, TMS), 1.33 (s, 7H,  $\text{CH}_3 + \text{OH}$ ), 1.59 (s, 2H,  $\text{CH}_2\text{TMS}$ ), 4.62 (s, 1H,  $=\text{CH}_2$ ), 4.95 (s, 1H,  $=\text{CH}_2$ );  $^{13}\text{C}$  NMR ( $\text{CDCl}_3$ , 100 MHz)  $\delta$  0.0 (q), 21.7 (t), 29.9 (q), 74.3 (s), 106.9 (d), 154.4 (s); LRMS  $\text{C}_9\text{H}_{20}\text{OSi} + \text{Na}^+$  calcd.  $m/z$  195.2, found  $m/z$  195.5.

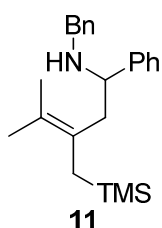

**N-benzyl-4-methyl-1-phenyl-3-((trimethylsilyl)methyl)pent-3-en-1-amine (11):** To a solution of 390 mg (2.0 mmol) of imine **5** in 8 mL of dry diethyl ether was added 0.91 mL (3.0 mmol) of  $\text{Ti}(\text{O}^i\text{Pr})_4$  via a syringe at rt under argon. After stirring for 10 min, the solution was cooled to  $-78^\circ\text{C}$ , and 3.0 mL (6.0 mmol) of 2.0 M  $\text{c-C}_5\text{H}_9\text{MgCl}$  in diethyl ether was added via a syringe over 2 min. The solution turned from yellow to dark

brown after stirring at -78 °C for 1.5 h. Next, a solution of lithium alkoxide of alcohol **10** in 2 mL of THF, prepared by deprotonation of 0.17 g (1.0 mmol) of alcohol **10** at -78 °C with 0.44 mL (1.1 mmol) of 2.5 M *n*-BuLi in hexanes followed by 10 min stirring, was added to the brown solution via cannula. The mixture was warmed to room temperature over 2 h, then stirred for 12 h. The reaction was quenched by sequential addition of 10 mL of ethyl ether and 5 mL of saturated aqueous NaHCO<sub>3</sub>, followed by vigorous stirring for 1 h. The aqueous phase was separated and extracted with 2 portions of 10 mL of ether. The organic extracts were combined, dried (MgSO<sub>4</sub>), and concentrated *in vacuo* to afford a pale yellow oil. The residue was purified by chromatography over 30 g of silica gel (hexanes-ethyl acetate, 20:1) to give 240 mg (70%) of homoallylic amine **11** as a colorless oil. Data for amine **11**: IR (neat) 3318, 2953, 1602, 1585, 1454 cm<sup>-1</sup>; <sup>1</sup>H NMR (CDCl<sub>3</sub>, 400 MHz) δ 0.00 (s, 9H, TMS), 1.33 and 1.60 (ABq, *J* = 14.0 Hz, 2H, CH<sub>2</sub>TMS), 1.62 (s, 3H, =C(CH<sub>3</sub>)<sub>2</sub>), 1.65 (s, 3H, =C(CH<sub>3</sub>)<sub>2</sub>), 1.78 (s, 1H, NH), 2.13 (dd, *J* = 13.6, 5.2 Hz, 1H, CH<sub>2</sub>CHN), 2.53 (dd, *J* = 13.2, 9.2 Hz, 1H, CH<sub>2</sub>CHN), 3.51 and 3.73 (ABq, *J* = 14.0 Hz, 2H, NCH<sub>2</sub>Ph), 3.80 (dd, *J* = 9.2, 5.2 Hz, 1H, CH<sub>2</sub>CHN), 7.26 (m, 4H), 7.32 (m, 4H), 7.43 (m, 2H); <sup>13</sup>C NMR (CDCl<sub>3</sub>, 100 MHz) δ 0.0 (q), 21.1 (q), 22.1 (q), 23.3 (t), 44.2 (t), 52.0 (t), 61.4 (d), 125.0 (s), 127.1 (s), 127.3 (d), 127.8 (d), 128.3 (d), 128.5 (d), 128.6 (d), 128.8 (d), 129.2 (d), 141.5 (s), 145.4 (s); LRMS C<sub>23</sub>H<sub>33</sub>NSi + H<sup>+</sup> calcd. *m/z* 352.2, found *m/z* 352.6.

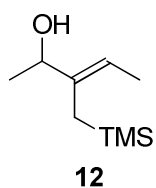

**(Z)-3-((trimethylsilyl)methyl)pent-3-en-2-ol (12):** IR (neat) 3368, 2956, 1660, 1455 cm<sup>-1</sup>; <sup>1</sup>H NMR (CDCl<sub>3</sub>, 400 MHz) δ 0.04 (s, 9H, TMS), 1.25 (d, *J* = 6.4 Hz, 3H, CH<sub>3</sub>), 1.35 (br, 1H, OH), 1.43 and 1.66 (ABq, *J* = 14.0 Hz, 2H, CH<sub>2</sub>TMS), 1.56 (d, *J* = 6.8 Hz, 3H, CH<sub>3</sub>), 4.10 (q, *J* = 6.4 Hz, 1H, CHOH), 5.43 (q, *J* = 6.8 Hz, 1H, =CHCH<sub>3</sub>); <sup>13</sup>C NMR (CDCl<sub>3</sub>,

100 MHz)  $\delta$  0.0 (q), 14.2 (q), 18.6 (t), 22.7 (q), 42.0 (s), 72.6 (d), 115.4 (d), 142.8 (s); LRMS  $C_9H_{20}OSi + Na^+$  calcd.  $m/z$  195.2, found  $m/z$  195.4.

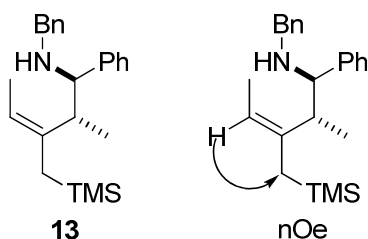

**(E)-N-benzyl-2-methyl-1-phenyl-3-((trimethylsilyl)methyl)pent-3-en-1-amine (13):**

To a solution of 131 mg (0.67 mmol) of imine **5** in 6 mL of dry diethyl ether in a 50 mL seal tube was added 0.30 mL (1.0 mmol) of  $Ti(O^iPr)_4$  via a syringe at rt under argon. After stirring for 10 min, the solution was cooled to  $-78^\circ C$ , and 1.0 mL (2.0 mmol) of 2.0 M  $c\text{-}C_5H_9MgCl$  in diethyl ether was added via a syringe over 2 min. The solution turned from yellow to dark brown after stirring at  $-78^\circ C$  for 1.5 h. Next, a solution of lithium alkoxide of alcohol **12** in 1 mL of THF, prepared by deprotonation of 0.17 g (1.0 mmol) of alcohol **12** at  $-78^\circ C$  with 0.44 mL (1.1 mmol) of 2.5 M  $n\text{-}BuLi$  in hexanes followed by 10 min stirring, was added to the brown solution via cannula. After the mixture was slowly warmed up to room temperature, and stirred for 16 h, the reaction was heated to  $80^\circ C$  and stirred for 24 h. The reaction was quenched by sequential addition of 10 mL of ethyl ether and 5 mL of saturated aqueous  $NaHCO_3$ , followed by vigorous stirring for 1 h. The aqueous phase was separated and extracted with 2 portions of 10 mL of ether. The organic extracts were combined, dried ( $MgSO_4$ ), and concentrated *in vacuo* to afford a pale yellow oil. The residue was purified by chromatography over 30 g of silica gel (hexanes-ethyl acetate, 20:1) to give 123 mg (51%) of homoallylic amine **13** as a colorless oil. No evidence of the presence of a minor isomer was found in the  $^1H$  NMR of the crude material. Relative stereochemistry was assigned by analogy to previous examples, and alkene geometry was determined by nOe.<sup>4</sup> Data for amine **13**: IR (neat) 3323, 2958, 1602  $cm^{-1}$ ;  $^1H$  NMR ( $CDCl_3$ , 400 MHz)  $\delta$  0.00 (s, 9H, TMS), 0.58 (d,  $J = 7.2$  Hz, 3H,  $CHCH_3$ ), 1.20 (t,  $J = 1.2$  Hz, 2H,  $CH_2TMS$ ), 1.64 (br, 1H, NH), 1.69 (d,  $J = 6.8$  Hz, 3H,  $CH_3CH=$ ), 2.82 (m, 1H,  $CH_3CHCHN$ ), 3.33 (d,  $J = 10.0$  Hz, 1H,  $CHN$ ), 3.51 and

3.73 (d,  $J = 14.0$  Hz, 2H,  $\text{NCH}_2\text{Ph}$ ), 5.30 (q,  $J = 6.8$  Hz, 1H,  $=\text{CHCH}_3$ ), 7.20 (m, 6H), 7.32 (m, 2H), 7.38 (m, 2H);  $^{13}\text{C}$  NMR ( $\text{CDCl}_3$ , 100 MHz)  $\delta$  0.0 (q), 13.9 (q), 16.4 (q), 20.0 (t), 42.3 (d), 51.8 (t), 65.3 (d), 121.6 (d), 127.1 (d), 127.5 (d), 128.59 (d), 128.62 (d), 128.63 (d), 129.2 (d), 139.5 (s), 141.4 (s), 143.9 (s); LRMS  $\text{C}_{23}\text{H}_{33}\text{NSi} + \text{H}^+$  calcd.  $m/z$  352.2, found  $m/z$  352.6.

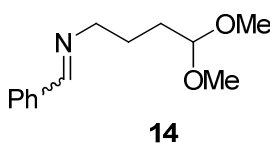

***N*-benzylidene-4,4-dimethoxybutan-1-amine (14):** IR (neat) 3278, 2950, 1651, 1580, 1451  $\text{cm}^{-1}$ ;  $^1\text{H}$  NMR ( $\text{CDCl}_3$ , 400 MHz)  $\delta$  1.70 (m, 2H,  $\text{CH}_2$ ), 1.79 (m, 2H,  $\text{CH}_2$ ), 3.32 (s, 6H,  $\text{CH}(\text{OMe})_2$ ), 3.65 (td,  $J = 6.4, 1.2$  Hz, 2H,  $\text{NCH}_2$ ), 4.44 (t,  $J = 5.6$  Hz, 1H,  $\text{CH}(\text{OMe})_2$ ), 7.42 (m, 3H, benzene), 7.74 (m, 2H, benzene), 8.29 (s, 1H,  $\text{N}=\text{CH}$ );  $^{13}\text{C}$  NMR ( $\text{CDCl}_3$ , 100 MHz)  $\delta$  26.0 (t), 30.3 (t), 52.7 (q), 61.3 (t), 104.4 (d), 128.0 (d), 128.6 (d), 130.5 (d), 136.3 (s), 161.1 (d); LRMS  $\text{C}_{13}\text{H}_{19}\text{NO}_2 + \text{H}^+$  calcd.  $m/z$  222.1, found  $m/z$  222.6.

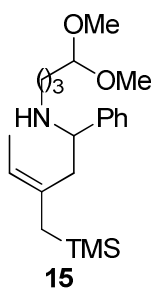

**(*E*)-*N*-(4,4-dimethoxybutyl)-1-phenyl-3-((trimethylsilyl)methyl)pent-3-en-1-amine (15):** To a solution of 240 mg (1.33 mmol) of imine **14** in 10 mL of dry diethyl ether was added 0.61 mL (2.0 mmol) of  $\text{Ti}(\text{O}^i\text{Pr})_4$  via a syringe at rt under argon. After stirring for 10 min, the solution was cooled to  $-78^\circ\text{C}$ , and 2.0 mL (4.0 mmol) of 2.0 M  $n\text{-C}_5\text{H}_9\text{MgCl}$  in diethyl ether was added via a syringe over 2 min. The solution turned from yellow to dark brown after stirring at  $-78^\circ\text{C}$  for 1.5 h. Next, a solution of lithium alkoxide of alcohol

**8** in 2 mL of THF, prepared by deprotonation of 312 mg (2.0 mmol) of alcohol **8** at -78 °C with 0.88 mL (2.2 mmol) of 2.5 M *n*-BuLi in hexanes followed by 10 min stirring, was added to the brown solution via cannula. The mixture was slowly warmed to room temperature, and stirred for 16 h. The reaction was quenched by sequential addition of 10 mL of ethyl ether and 5 mL of saturated aqueous NaHCO<sub>3</sub>, followed by vigorous stirring for 1 h. The aqueous phase was extracted with 2 portions of 10 mL of diethyl ether. The organic extracts were combined, dried (MgSO<sub>4</sub>), and concentrated *in vacuo* to afford a pale yellow oil. The residue was purified by chromatography over 30 g of silica gel (hexanes-ethyl acetate, 10:1 to 2:1) to give 323 mg (66%) of homoallylic amine **15** as a colorless oil. No evidence of the presence of a minor isomer was found in the <sup>1</sup>H NMR of the crude material. Stereochemistry was assigned by analogy to previous examples.<sup>4</sup> Data for amine **15**: IR (neat) 3320, 2951, 1602, 1454 cm<sup>-1</sup>; <sup>1</sup>H NMR (CDCl<sub>3</sub>, 400 MHz) δ 0.00 (s, 9H, TMS), 1.45 (ABq, *J* = 14.0 Hz, 2H, CH<sub>2</sub>TMS), 1.50 (d, *J* = 6.8 Hz, 3H, CH<sub>3</sub>CH=), 1.59 (m, 5H, NH and -(CH<sub>2</sub>)<sub>2</sub>CH(OMe)<sub>2</sub>), 2.16 (dd, *J* = 13.2, 5.2 Hz, 1H, CH<sub>2</sub>CHN), 2.52 (dd, *J* = 13.2, 8.8 Hz, 1H, CH<sub>2</sub>CHN), 3.30 (s, 6H, CH(OMe)<sub>2</sub>), 3.76 (d, *J* = 8.8, 5.2 Hz, 1H, CHN), 4.33 (t, *J* = 5.6 Hz, 1H, CH(OMe)<sub>2</sub>), 5.16 (q, *J* = 6.8 Hz, 1H, =CHCH<sub>3</sub>), 7.31 (m, 5H); <sup>13</sup>C NMR (CDCl<sub>3</sub>, 100 MHz) δ 0.0 (q), 14.8 (q), 26.1 (t), 27.9 (t), 31.3 (t), 42.2 (t), 48.7 (t), 53.8 (q), 53.9 (q), 62.8 (d), 105.6 (d), 121.1(d), 128.1 (d), 128.4 (d), 129.4 (d), 129.4 (s), 135.3 (s); HRMS C<sub>21</sub>H<sub>37</sub>NO<sub>2</sub>Si + H<sup>+</sup> calcd. *m/z* 364.2666, found *m/z* 364.2684.

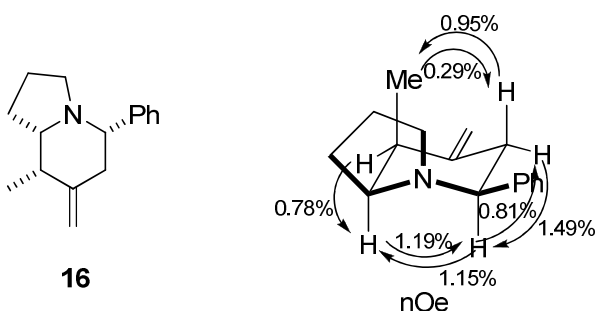

**(5S\*, 8S\*, 8aS\*)-8-methyl-7-methylene-5-phenyloctahydroindolizine (16):** To a solution of 50 mg (0.15 mmol) of imine **15** in 1 mL of THF was added 0.75 mL (0.75

mmol) of 1N HCl aqueous solution at rt under argon. After stirring for 1 h, the reaction was quenched by addition of 0.1 g (0.75 mmol) of pulverized K<sub>2</sub>CO<sub>3</sub>. The neutralized mixture was extracted with 10 mL of CH<sub>2</sub>Cl<sub>2</sub>. The organic extract was dried (MgSO<sub>4</sub>), and concentrated *in vacuo* to afford a pale yellow oil. The residue was purified by chromatography over 30 g of silica gel (hexanes-ethyl acetate, 40:1) to give 30 mg (88%) of indolizidine **16** as a yellow oil. No evidence for the presence of a minor isomer was observed in the <sup>1</sup>H NMR of the crude material. Stereochemistry was assigned by nOe. Data for indolizidine **16**: IR (neat) 3584, 2970, 151, 1601 cm<sup>-1</sup>; <sup>1</sup>H NMR (CD<sub>2</sub>Cl<sub>2</sub>, 400 MHz) δ 1.09 (d, *J* = 7.2 Hz, 3H, CH<sub>3</sub>), 1.52 (m, 4H, -(CH<sub>2</sub>)<sub>2</sub>-), 1.65 (q, *J* = 8.8 Hz, 1H, NCH<sub>2</sub>), 2.04 (dd, *J* = 13.6, 3.2 Hz, 1H, CH<sub>2</sub>CHN), 2.12 (td, *J* = 8.4, 2.8 Hz, 1H, C(9)H), 2.35 (dd, *J* = 10.2, 8.7 Hz, 1H, CH<sub>2</sub>CHN), 2.42 (qd, *J* = 7.2, 3.2 Hz, C(9)H), 2.61 (m, 1H, NCH<sub>2</sub>), 2.80 (dd, *J* = 11.2, 3.2 Hz, 1H, C(5)H), 4.54 (s, 1H, =CH<sub>2</sub>), 4.66 (s, 1H, =CH<sub>2</sub>), 7.22 (m, 5H); <sup>13</sup>C NMR (CD<sub>2</sub>Cl<sub>2</sub>, 100 MHz) δ 13.4 (q), 21.4 (t), 26.6 (t), 40.6 (d), 40.7 (t), 52.7 (t), 68.3 (d), 70.6 (d), 107.3 (t), 127.3 (d), 127.6 (d), 128.6 (d), 145.1 (s), 153.0 (s); HRMS C<sub>16</sub>H<sub>21</sub>N + H<sup>+</sup> calcd. *m/z* 228.1747, found *m/z* 228.1753.

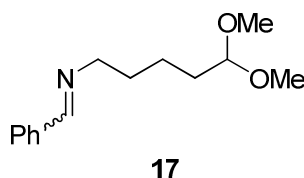

**N-benzylidene-5,5-dimethoxypentan-1-amine (17):** IR (neat) 3278, 2945, 1651, 1580, 1452 cm<sup>-1</sup>; <sup>1</sup>H NMR (CDCl<sub>3</sub>, 400 MHz) δ 1.42 (m, 2H, CH<sub>2</sub>), 1.67 (m, 2H, CH<sub>2</sub>), 1.75 (m, 2H, CH<sub>2</sub>), 3.33 (s, 6H, CH(OMe)<sub>2</sub>), 3.63 (td, *J* = 6.4, 1.2 Hz, 2H, NCH<sub>2</sub>), 4.39 (t, *J* = 5.6 Hz, 1H, CH(OMe)<sub>2</sub>), 7.42 (m, 3H, benzene), 7.74 (m, 2H, benzene), 8.29 (s, 1H, N=CH); <sup>13</sup>C NMR (CDCl<sub>3</sub>, 100 MHz) δ 22.4 (t), 30.7 (t), 32.3 (t), 52.7 (q), 61.6 (t), 104.5 (d), 128.0 (d), 128.6 (d), 130.5 (d), 136.3 (s), 160.9 (d); LRMS C<sub>14</sub>H<sub>21</sub>NO<sub>2</sub> + H<sup>+</sup> calcd. *m/z* 236.2, found *m/z* 236.5.

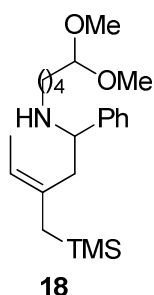

**(E)-N-(5,5-dimethoxypentyl)-1-phenyl-3-((trimethylsilyl)methyl)pent-3-en-1-amine**

**(18):** To a solution of 160 mg (0.67 mmol) of imine **17** in 6 mL of dry diethyl ether was added 0.30 mL (1.0 mmol) of  $\text{Ti}(\text{O}^i\text{Pr})_4$  via a syringe at rt under argon. After stirring for 10 min, the solution was cooled to  $-78\text{ }^\circ\text{C}$ , and 1.0 mL (2.0 mmol) of 2.0 M  $n\text{-C}_5\text{H}_9\text{MgCl}$  in diethyl ether was added via a syringe over 2 min. The solution turned from yellow to dark brown after stirring at  $-78\text{ }^\circ\text{C}$  for 1.5 h. Next, a solution of lithium alkoxide of alcohol **8** in 2 mL of THF, prepared by deprotonation of 156 mg (1.0 mmol) of alcohol **8** at  $-78\text{ }^\circ\text{C}$  with 0.44 mL (2.2 mmol) of 2.5 M  $n\text{-BuLi}$  in hexanes followed by 10 min stirring, was added to the brown solution via cannula. The mixture was slowly warmed to room temperature, and stirred for 16 h. The reaction was quenched by sequential addition of 10 mL of ethyl ether and 5 mL of saturated aqueous  $\text{NaHCO}_3$ , followed by vigorous stirring for 1 h. The aqueous phase was extracted with two portions of 10 mL of diethyl ether. The organic extracts were combined, dried ( $\text{MgSO}_4$ ), and concentrated *in vacuo* to afford a pale yellow oil. The residue was purified by chromatography over 30 g of silica gel (hexanes-ethyl acetate, 10:1 to 2:1) to give 170 mg (66%) of homoallylic amine **18** as a colorless oil. No evidence for the presence of a minor isomer was found in  $^1\text{H}$  NMR of the crude material. Stereochemistry was assigned by analogy to previous examples.<sup>4</sup> Data for amine **18**: IR (neat) 3321, 2919, 1652, 1602, 1455  $\text{cm}^{-1}$ ;  $^1\text{H}$  NMR ( $\text{CDCl}_3$ , 400 MHz)  $\delta$  0.00 (s, 9H, TMS), 1.33 (m, 2H,  $\text{CH}_2$ ), 1.45 (ABq,  $J = 14.0\text{ Hz}$ , 2H,  $\text{CH}_2\text{TMS}$ ), 1.48 (m, 3H, NH and  $\text{CH}_2$ ), 1.50 (d,  $J = 6.8\text{ Hz}$ , 3H,  $\text{CH}_3\text{CH=}$ ), 1.58 (m, 2H,  $\text{CH}_2$ ), 2.11 (dd,  $J = 13.2, 5.6\text{ Hz}$ , 1H,  $\text{CH}_2\text{CHN}$ ), 2.43 (t,  $J = 7.2\text{ Hz}$ , 2H,  $\text{NCH}_2$ ), 2.48 (dd,  $J = 13.2, 8.8\text{ Hz}$ , 1H,  $\text{CH}_2\text{CHN}$ ), 3.30 (s, 6H,  $\text{CH}(\text{OMe})_2$ ), 3.76 (dd,  $J = 8.8, 5.6\text{ Hz}$ , 1H,

CHN), 4.34 (t,  $J = 6.0$  Hz, 1H,  $\text{CH}(\text{OMe})_2$ ), 5.16 (q,  $J = 6.8$  Hz, 1H,  $=\text{CHCH}_3$ ), 7.31 (m, 5H);  $^{13}\text{C}$  NMR ( $\text{CDCl}_3$ , 100 MHz)  $\delta$  0.0 (q), 14.7 (q), 23.5 (t), 27.9 (t), 31.1 (t), 33.5 (t), 42.4 (t), 49.0 (t), 53.7 (q), 53.8 (q), 62.9 (d), 105.6 (d), 120.9 (d), 127.9 (d), 128.3 (d), 129.3 (d), 135.5 (s), 146.1 (s); HRMS  $\text{C}_{22}\text{H}_{39}\text{NO}_2\text{Si} + \text{H}^+$  calcd.  $m/z$  378.2823, found  $m/z$  378.2839.

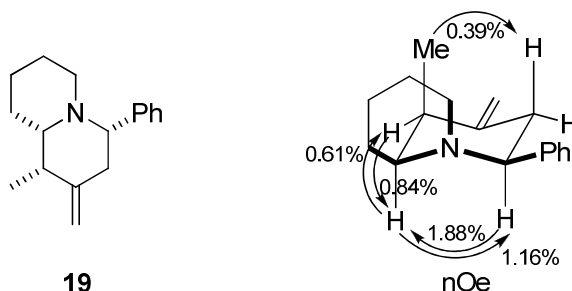

**(1*S*\*,4*S*\*,9*aS*\*)-1-methyl-2-methylene-4-phenyloctahydro-1H-quinolizidine (19):** To a solution of 100 mg (0.26 mmol) of imine **18** in 2 mL of THF was added 1.3 mL (1.3 mmol) of 1N HCl aqueous solution at rt under argon. After stirring for 12 h, the reaction was quenched by addition of 0.15 g (1.1 mmol) of pulverized  $\text{K}_2\text{CO}_3$ . The neutralized mixture was extracted with 2 x 5 mL of diethyl ether. The organic extracts were dried ( $\text{MgSO}_4$ ), and concentrated *in vacuo* to afford a pale yellow oil. The residue was purified by chromatography over 50 g of silica gel (hexanes-ethyl acetate, 20:1) to give 55 mg (88%) of quinolizidine **19** as a yellow oil. No evidence for the presence of a minor isomer was found in the  $^1\text{H}$  NMR of the crude material. Stereochemistry was assigned by nOe. Data for quinolizidine **19**: IR (neat) 3643, 2936, 1656  $\text{cm}^{-1}$ ;  $^1\text{H}$  NMR ( $\text{CD}_2\text{Cl}_2$ , 400 MHz)  $\delta$  1.21 (d,  $J = 7.2$  Hz, 3H,  $\text{CH}_3$ ), 1.38 (m, 2H,  $-\text{CH}_2-$ ), 1.42 (m, 2H,  $-\text{CH}_2-$ ), 1.51 (m, 2H,  $-\text{CH}_2-$ ), 1.64 and 2.58 (m, 2H,  $\text{NCH}_2$ ), 1.98 (td,  $J = 11.6, 3.2$  Hz, 1H, C(9)H), 2.04 (m, 1H, 1H,  $\text{CH}_2\text{CHN}$ ), 2.18 (qd,  $J = 6.8, 2.8$  Hz, C(1)H), 2.39 (dd,  $J = 13.6, 12.0$  Hz, 1H, C(3)H), 2.78 (dd,  $J = 12.0, 4.0$  Hz, 1H, C(4)H), 4.48 (s, 1H,  $=\text{CH}_2$ ), 4.60 (s, 1H,  $=\text{CH}_2$ ), 7.28 (m, 5H);  $^{13}\text{C}$  NMR ( $\text{CD}_2\text{Cl}_2$ , 100 MHz)  $\delta$  14.6 (q), 25.3 (t), 26.6 (t), 31.1 (t), 41.0 (t), 43.7 (d), 54.6 (t), 66.8 (d), 72.6 (d), 105.5 (t), 127.1 (d), 127.7 (d), 128.7 (d), 146.0 (s), 152.8 (s); HRMS  $\text{C}_{17}\text{H}_{23}\text{N} + \text{H}^+$  calcd.  $m/z$  242.1903, found  $m/z$  242.1914.

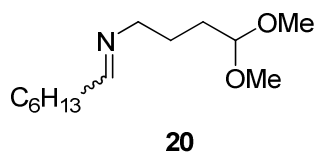

***N*-heptylidene-4,4-dimethoxybutan-1-amine (20):** IR (neat) 3323, 2927, 1669, 1463  $\text{cm}^{-1}$ ;  $^1\text{H}$  NMR ( $\text{CDCl}_3$ , 400 MHz)  $\delta$  0.81 (t,  $J$  = 6.8 Hz, 3H,  $\text{CH}_3$ ), 1.22 (m, 6H, 3 x  $\text{CH}_2$ ), 1.46 (m, 2H,  $\text{CH}_2$ ), 1.57 (m, 4H, 2 x  $\text{CH}_2$ ), 2.16 (m, 2H,  $\text{CH}_2\text{CH}(\text{OMe})_2$ ), 3.25 (s, 6H,  $\text{CH}(\text{OMe})_2$ ), 3.28 (t,  $J$  = 6.4 Hz, 2H,  $\text{NCH}_2$ ), 4.31 (t,  $J$  = 5.6 Hz, 1H,  $\text{CH}(\text{OMe})_2$ ), 7.57 (t,  $J$  = 4.8 Hz, 1H,  $\text{N}=\text{CH}$ );  $^{13}\text{C}$  NMR ( $\text{CDCl}_3$ , 100 MHz)  $\delta$  14.0 (q), 22.6 (t), 25.8 (t), 26.0 (t), 28.9 (t), 30.2 (t), 31.6 (t), 35.8 (t), 52.5 (q), 52.6 (q), 61.0 (t), 104.4 (d), 165.4 (d); LRMS  $\text{C}_{13}\text{H}_{27}\text{NO}_2 + \text{H}^+$  calcd.  $m/z$  230.2, found  $m/z$  230.5.

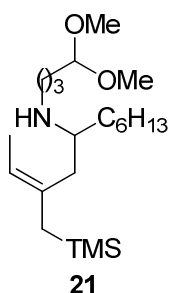

**(*E*)-*N*-(4,4-dimethoxybutyl)-3-((trimethylsilyl)methyl)undec-2-en-5-amine (21):** To a solution of 569 mg (2.0 mmol) of  $\text{Ti}(\text{O}^i\text{Pr})_4$  in 10 mL of diethyl ether was added 1.6 mL (4.0 mmol) of 2.5 M *n*-BuLi in hexanes over 2 min at  $-78^\circ\text{C}$  under argon. After 10 min, a solution of 459 mg (2.0 mmol) of imine **20** in 2 mL of dry diethyl ether was added via a syringe. The mixture was stirred at  $-78^\circ\text{C}$  for 0.5 h, then was raised to rt over 30 min. The solution turned from pale yellow to red. The red homogeneous solution was cooled back to  $-78^\circ\text{C}$ , and a solution of lithium alkoxide of alcohol **8** in 4 mL of THF, prepared by deprotonation of 156 mg (1.0 mmol) of alcohol **8** at  $-78^\circ\text{C}$  with 0.44 mL (1.1 mmol) of 2.5 M *n*-BuLi in hexanes followed by 10 min stirring, was added immediately to the red solution via cannula. The mixture was slowly warmed to room temperature, and stirred

for 16 h. The reaction was quenched by sequential addition of 10 mL of ethyl ether and 5 mL of saturated aqueous NaHCO<sub>3</sub>, followed by vigorous stirring for 1 h. The aqueous phase was extracted with two portions of 10 mL of diethyl ether. The organic extracts were combined, dried (MgSO<sub>4</sub>), and concentrated *in vacuo* to afford a pale yellow oil. The residue was purified by chromatography over 30 g of silica gel (hexanes-ethyl acetate, 5:1 to 1:1) to give 261 mg (70%) of homoallylic amine **21** as a yellow oil. No evidence for the presence of a minor isomer was found in the <sup>1</sup>H NMR of the crude material. Stereochemistry was assigned by analogy to previous examples.<sup>4</sup> Data for amine **21**: IR (neat) 3311, 2928, 1652, 1464 cm<sup>-1</sup>; <sup>1</sup>H NMR (CDCl<sub>3</sub>, 400 MHz) δ 0.00 (s, 9H, TMS), 0.89 (t, *J* = 6.8 Hz, 3H, CH<sub>3</sub>(CH<sub>2</sub>)<sub>5</sub>-), 1.31 (m, 10H, CH<sub>2</sub>TMS and CH<sub>3</sub>(CH<sub>2</sub>)<sub>5</sub>-), 1.51 (m, 5H, NH + CH<sub>2</sub>), 1.61 (d, *J* = 6.8 Hz, 3H, CH<sub>3</sub>CH=), 1.97 (dd, *J* = 13.2, 5.6 Hz, 1H, CH<sub>2</sub>CHN), 2.17 (dd, *J* = 13.2, 8.4 Hz, 1H, CH<sub>2</sub>CHN), 2.53 (dd, *J* = 8.4, 5.6 Hz, 1H, CHN), 2.64 (m, 2H, CH<sub>2</sub>), 3.32 (s, 6H, OCH<sub>3</sub>), 4.37 (t, *J* = 5.6 Hz, 1H, CH(OMe)<sub>2</sub>), 5.16 (q, *J* = 6.8 Hz, 1H, =CHCH<sub>3</sub>); <sup>13</sup>C NMR (CDCl<sub>3</sub>, 100 MHz) δ 0.0 (q), 14.9 (q), 15.3 (q), 23.8 (t), 26.7 (t), 27.1 (t), 28.1 (t), 30.8 (t), 31.5 (t), 33.1 (t), 35.6 (t), 38.0 (t), 48.5 (t), 53.8 (q), 53.9 (q), 57.5 (d), 105.6 (d), 120.3 (d), 136.3 (s); HRMS C<sub>21</sub>H<sub>44</sub>NO<sub>2</sub>Si + H<sup>+</sup> calcd. *m/z* 372.3292, found *m/z* 372.3307.

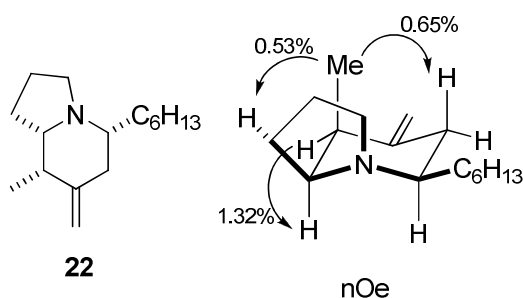

**(5*R*\*,8*S*\*,8*aS*\*)-5-hexyl-8-methyl-7-methyleneoctahydroindolizine (**22**):** To a solution of 75 mg (0.20 mmol) of imine **21** in 5 mL of THF was added 1.0 mL (1.0 mmol) of 1N HCl aqueous solution at rt under argon. After stirring for 16 h, the reaction was quenched by addition of 0.15 g (1.1 mmol) of pulverized K<sub>2</sub>CO<sub>3</sub>. The neutralized mixture was extracted with 2 x 5 mL of diethyl ether. The organic extracts were dried (MgSO<sub>4</sub>),

and concentrated *in vacuo* to afford pale yellow oil. The residue was purified by chromatography over 20 g of silica gel (hexanes-ethyl acetate, 20:1) to give 45 mg (95%) of indolizidine **22** as a yellow oil. No evidence for the presence of a minor isomer was found in  $^1\text{H}$  NMR of the crude. Stereochemistry was assigned by nOe. Data for indolizidine **22**: IR (neat) 3584, 2931, 1651  $\text{cm}^{-1}$ ;  $^1\text{H}$  NMR ( $\text{CDCl}_3$ , 400 MHz)  $\delta$  0.81 (d,  $J$  = 6.0 Hz, 3H,  $\text{CH}_3$ ), 0.95 (d,  $J$  = 7.2 Hz, 3H, C(8) $\underline{\text{H}}$  $\text{CH}_3$ ), 1.18 (m, 10H,  $-(\text{CH}_2)_5-$ ), 1.54 (m, 3H), 1.62 (m, 1H, C(6) $\underline{\text{H}}$  $_2$ ), 1.73 (m, 1H), 1.78 (dd,  $J$  = 8.4 Hz, 8.0 Hz, 1H, C(6) $\underline{\text{H}}$  $_2$ ), 1.97 (m, 1H, C(9) $\underline{\text{H}}$ ), 2.00 (m, 2H,  $\text{NCH}_2$ ), 2.32 (qd,  $J$  = 6.4, 3.2 Hz, C(8) $\text{HCH}_3$ ), 3.14 (dd,  $J$  = 8.0, 6.0 Hz, C(5)H), 4.51 (s, 1H,  $\text{CH}_2$ ), 4.58 (s, 1H,  $\text{CH}_2$ );  $^{13}\text{C}$  NMR ( $\text{CD}_2\text{Cl}_2$ , 100 MHz)  $\delta$  13.3 (q), 14.1 (q), 21.0 (t), 22.6 (t), 25.3 (t), 26.1 (t), 29.7 (t), 31.8 (t), 34.7 (t), 35.7 (t), 40.1 (d), 51.8 (t), 65.0 (d), 68.3 (d), 106.9 (t), 152.8 (s); HRMS  $\text{C}_{16}\text{H}_{29}\text{N} + \text{H}^+$  calcd.  $m/z$  236.2373, found  $m/z$  236.2380.

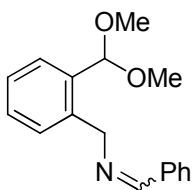

**23**

**N-benzylidene-1-(2-(dimethoxymethyl)phenyl)methanamine (23):** IR (neat) 3272, 2829, 1651, 1580, 1454  $\text{cm}^{-1}$ ;  $^1\text{H}$  NMR ( $\text{CDCl}_3$ , 400 MHz)  $\delta$  3.35 (s, 6H,  $\text{CH}(\text{OMe})_2$ ), 4.95 (d,  $J$  = 1.2 Hz, 2H,  $\text{NCH}_2$ ), 5.65 (s, 1H,  $\text{CH}(\text{OMe})_2$ ), 7.28 (m, 2H, benzene), 7.41 (m, 4H, benzene), 7.61 (m, 1H, benzene), 7.78 (m, 2H, benzene), 7.79 (m, 1H,  $\text{N}=\text{CH}$ );  $^{13}\text{C}$  NMR ( $\text{CDCl}_3$ , 100 MHz)  $\delta$  53.3 (q), 61.5 (t), 101.7 (d), 126.7 (d), 126.8 (d), 128.2 (d), 128.6 (d), 128.7 (d), 128.9 (d), 130.7 (d), 135.4 (s), 136.3 (s), 137.5 (s), 162.0 (d); LRMS  $\text{C}_{17}\text{H}_{19}\text{NO}_2 + \text{H}^+$  calcd.  $m/z$  270.1, found  $m/z$  270.5.

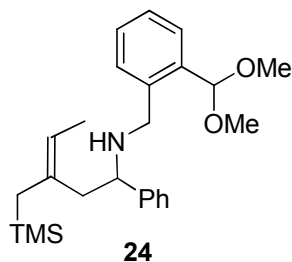

**(E)-N-(2-(dimethoxymethyl)benzyl)-1-phenyl-3-((trimethylsilyl)methyl)pent-3-en-1-**

**amine (24):** To a solution of 458 mg (1.7 mmol) of imine **23** in 8 mL of dry diethyl ether was added 0.77 mL (2.55 mmol) of  $\text{Ti}(\text{O}^i\text{Pr})_4$  via a syringe at rt under argon. After stirring for 10 min, the solution was cooled to  $-78\text{ }^\circ\text{C}$ , and 2.55 mL (5.1 mmol) of 2.0 M  $n\text{-C}_5\text{H}_9\text{MgCl}$  in diethyl ether was added via a syringe over 2 min. The solution turned from yellow to dark brown after stirring at  $-78\text{ }^\circ\text{C}$  for 1.5 h. Next, a solution of lithium alkoxide of alcohol **8** in 4 mL of THF, prepared by deprotonation of 399 mg (2.55 mmol) of alcohol **8** at  $-78\text{ }^\circ\text{C}$  with 1.1 mL (2.8 mmol) of 2.5 M  $n\text{-BuLi}$  in hexanes followed by 10 min stirring, was added to the brown solution via cannula. The mixture was slowly warmed to room temperature, and stirred for 16 h. The reaction was quenched by sequential addition of 10 mL of ethyl ether and 5 mL of saturated aqueous  $\text{NaHCO}_3$ , followed by vigorous stirring for 1 h. The aqueous phase was extracted with two portions of 10 mL of diethyl ether. The organic extracts were combined, dried ( $\text{MgSO}_4$ ), and concentrated *in vacuo* to afford a pale yellow oil. The residue was purified by chromatography over 50 g of silica gel (hexanes-ethyl acetate, 10:1) to give 420 mg (61%) of homoallylic amine **24** as colorless oil. No evidence for the presence of a minor isomer was observed in the  $^1\text{H}$  NMR of the crude material. Stereochemistry was assigned by analogy to previous examples.<sup>4</sup> Data for amine **24**: IR (neat) 3323, 2593, 1651m 1455  $\text{cm}^{-1}$ ;  $^1\text{H}$  NMR ( $\text{CDCl}_3$ , 400 MHz)  $\delta$  0.00 (s, 9H, TMS), 1.37 and 1.43 (ABq,  $J = 14.0\text{ Hz}$ , 2H,  $\text{CH}_2\text{TMS}$ ), 1.53 (d,  $J = 6.8\text{ Hz}$ , 3H,  $\text{CH}_3$ ), 1.82 (br, 1H, NH), 2.15 (dd,  $J = 13.2, 4.2\text{ Hz}$ , 1H,  $\text{CH}_2\text{CHN}$ ), 2.52 (dd,  $J = 13.2, 8.8\text{ Hz}$ , 1H,  $\text{CH}_2\text{CHN}$ ), 3.30 (s, 3H,  $\text{CH}(\text{OMe})_2$ ), 3.33 (s, 3H,  $\text{CH}(\text{OMe})_2$ ), 3.62 and 3.71 (ABq,  $J = 13.2\text{ Hz}$ , 2H,  $\text{NCH}_2$ ), 3.76 (dd,  $J = 8.8, 5.2\text{ Hz}$ , 1H,  $\text{CHN}$ ), 5.16 (q,  $J = 6.8\text{ Hz}$ , 1H,  $=\text{CHCH}_3$ ), 5.46 (s, 1H,  $\text{CH}(\text{OMe})_2$ ), 7.29 (m, 4H, benzene), 7.36 (m, 2H), 7.45 (m, 2H), 7.56 (m, 1H);  $^{13}\text{C}$  NMR ( $\text{CDCl}_3$ , 100 MHz)  $\delta$  0.0 (q), 14.7 (q), 27.9 (t), 42.6 (t), 49.7 (t), 54.5 (q), 54.7 (q), 62.1

(d), 102.9 (d), 121.0 (d), 127.8 (d), 128.1 (d), 128.6 (d), 129.5 (d), 129.6 (d), 130.8 (d), 135.4 (s), 137.2 (s), 139.7 (s), 145.9 (s); HRMS  $C_{25}H_{37}NO_2Si + H^+$  calcd.  $m/z$  412.2666, found  $m/z$  412.2681.

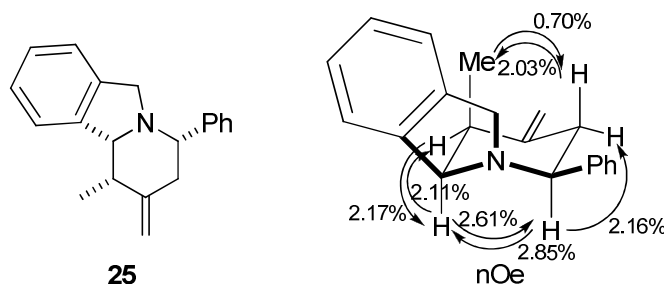

**(1 $S^*$ ,4 $S^*$ ,10b $R^*$ )-1-methyl-2-methylene-4-phenyl-1,2,3,4,6,10b-hexahydropyrido-[2,1-a]isoindole (**25**):**

To a solution of 85 mg (0.21 mmol) of imine **24** in 5 mL of THF was added 0.5 mL (0.5 mmol) of 1N HCl aqueous solution at rt under argon. After stirring for 16 h, the mixture turned green, and was quenched by addition of 0.15 g (1.1 mmol) of pulverized  $K_2CO_3$ . The neutralized mixture was extracted with 2 x 5 mL of diethyl ether. The organic extracts were dried ( $MgSO_4$ ), and concentrated *in vacuo* to afford a dark green oil. The residue was purified by chromatography over 20 g of silica gel (hexanes-ethyl acetate, 40:1) to give 52 mg (90%) of indolizidine **25** as a yellow oil. No evidence for the presence of a minor isomer was found in the  $^1H$  NMR of the crude material (spectrum provided). Stereochemistry was assigned by nOe. Data for indolizidine **25**: IR (neat) 3390, 2902, 2759, 1645, 1454  $cm^{-1}$ ;  $^1H$  NMR ( $CDCl_3$ , 400 MHz)  $\delta$  1.11 (d,  $J$  = 6.0 Hz, 3H,  $CH_3$ ), 2.22 (dd,  $J$  = 14.0 Hz, 3.2 Hz, 1H, C(3) $H_2$ ), 2.53 (dd,  $J$  = 14.0, 11.2 Hz, 1H, C(3) $H_2$ ), 2.99 (qd,  $J$  = 6.0, 3.2 Hz, 1H, C(1)H), 3.09 and 3.74 (ABq,  $J$  = 12.4 Hz,  $NCH_2$ ), 3.40 (dd,  $J$  = 11.2, 3.2 Hz, 1H, C(4)H), 3.59 (m, 1H, C(9)H), 4.69 (s, 1H,  $=CH_2$ ), 4.84 (s, 1H,  $=CH_2$ ), 7.05 (m, 3H, benzene), 7.10 (m, 1H, benzene), 7.19 (m, 1H, benzene), 7.28 (m, 2H, benzene), 7.35 (m, 2H, benzene);  $^{13}C$  NMR ( $CDCl_3$ , 100 MHz)  $\delta$  13.6 (q), 39.3 (d), 40.9 (t), 55.7 (t), 68.5 (d), 71.5 (d), 108.7 (t), 121.2 (d), 122.5 (d), 126.5 (d), 126.6 (d), 127.2 (d), 127.4 (d), 128.5 (d), 140.8 (s), 141.8 (s), 143.6 (s), 150.9 (s); HRMS  $C_{20}H_{21}N + H^+$  calcd.  $m/z$  276.1747, found  $m/z$  276.1766.

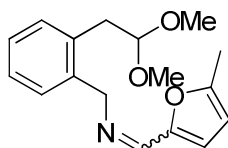

**26**

**1-(2-(2,2-dimethoxyethyl)phenyl)-*N*-((5-methylfuran-2-yl)methylene)methanamine (26):** IR (neat) 3584, 2933, 1737, 1645, 1453  $\text{cm}^{-1}$ ;  $^1\text{H}$  NMR ( $\text{CDCl}_3$ , 400 MHz)  $\delta$  2.28 (s, 3H,  $\text{CH}_3$ ), 2.90 (d,  $J = 5.6$  Hz, 2H,  $\text{CH}_2$ ), 3.25 (s, 6H,  $\text{CH}(\text{OMe})_2$ ), 4.48 (t,  $J = 5.6$  Hz, 1H,  $\text{CH}(\text{OMe})_2$ ), 4.78 (s, 2H,  $\text{CH}_2$ ), 6.00 (s, 1H, furan), 6.54 (m, 1H, furan), 7.16 (m, 4H, benzene), 7.91 (s, 1H,  $\text{CH}=\text{NR}$ ) ;  $^{13}\text{C}$  NMR ( $\text{CDCl}_3$ , 100 MHz)  $\delta$  13.9 (q), 36.6 (t), 53.9 (q), 62.1 (q), 105.7 (d), 108.0 (d), 116.1 (d), 126.8 (d), 127.2 (d), 129.4 (d), 130.6 (d), 135.4 (s), 137.5 (s), 150.1 (d), 150.4 (s), 155.5 (s); LRMS  $\text{C}_{17}\text{H}_{21}\text{NO}_3 + \text{H}^+$  calcd.  $m/z$  288.2, found  $m/z$  288.5.

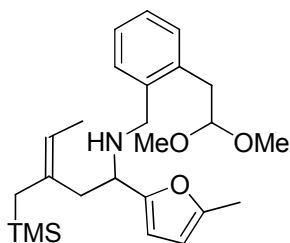

**27**

**(*E*)-*N*-(2-(dimethoxymethyl)benzyl)-1-phenyl-3-((trimethylsilyl)methyl)pent-3-en-1-amine (27):** To a solution of 575 mg (2.0 mmol) of imine **26** in 8 mL of dry diethyl ether was added 0.91 mL (3.0 mmol) of  $\text{Ti}(\text{O}^i\text{Pr})_4$  via a syringe at rt under argon. After stirring for 10 min, the solution was cooled to  $-78^\circ\text{C}$ , and 3.0 mL (6.0 mmol) of 2.0 M  $n\text{-C}_5\text{H}_9\text{MgCl}$  in diethyl ether was added via a syringe over 2 min. The solution turned from yellow to dark brown after stirring at  $-78^\circ\text{C}$  for 1.5 h. Next, a solution of lithium alkoxide of alcohol **8** in 4 mL of THF, prepared by deprotonation of 156 mg (1.0 mmol) of alcohol **8** at  $-78^\circ\text{C}$  with 0.44 mL (1.1 mmol) of 2.5 M  $n\text{-BuLi}$  in hexanes followed by 10 min stirring, was added to the brown solution via cannula. The mixture was slowly warmed to room temperature, and stirred for 16 h. The reaction was quenched by sequential

addition of 10 mL of ethyl ether and 5 mL of saturated aqueous NaHCO<sub>3</sub>, followed by vigorous stirring for 1 h. The aqueous phase was extracted with two portions of 10 mL of diethyl ether. The organic extracts were combined, dried (MgSO<sub>4</sub>), and concentrated *in vacuo* to afford a pale yellow oil. The residue was purified by chromatography over 30 g of silica gel (hexanes-ethyl acetate, 10:1 to 5:1) to give 235 mg (55%) of homoallylic amine **27** as a yellow oil. No evidence for the presence of a minor isomer was found in the <sup>1</sup>H NMR of the crude material. Stereochemistry was assigned by analogy to previous examples.<sup>4</sup> Data for amine **27**: IR (neat) 3319, 2952, 1605, 1566, 1454 cm<sup>-1</sup>; <sup>1</sup>H NMR (CDCl<sub>3</sub>, 400 MHz) δ 0.00 (s, 9H, TMS), 1.31 and 1.39 (ABq, *J* = 13.6 Hz, 2H, CH<sub>2</sub>TMS), 1.54 (d, *J* = 6.8 Hz, 3H, CH<sub>3</sub>CH=), 1.74 (br, 1H, NH), 2.32 (s, 3H, CH<sub>3</sub>), 2.40 (dd, *J* = 13.2, 7.2 Hz, 1H, CH<sub>2</sub>CHN), 2.54 (dd, *J* = 13.2, 7.2 Hz, 1H, CH<sub>2</sub>CHN), 2.95 (d, *J* = 5.6 Hz, 2H, CH<sub>2</sub>CH(OMe)<sub>2</sub>), 3.33 (s, 3H, CH(OMe)<sub>2</sub>), 3.34 (s, 3H, CH(OMe)<sub>2</sub>), 3.66 and 3.78 (ABq, *J* = 13.2 Hz, 2H, NHCH<sub>2</sub>Ph), 3.80 (t, *J* = 7.2 Hz, 1H, CHN), 4.56 (t, *J* = 5.6 Hz, 1H, CH(OMe)<sub>2</sub>), 5.12 (q, *J* = 6.8 Hz, 1H, =CHCH<sub>3</sub>), 5.91 (m, 1H, furan), 6.08 (m, 1H, furan), 7.22 (m, 4H, benzene); <sup>13</sup>C NMR (CDCl<sub>3</sub>, 100 MHz) δ 0.0 (q), 14.7 (q), 14.9 (q), 27.8 (t), 37.4 (t), 38.7 (t), 50.5 (t), 54.9 (q), 55.9 (q), 106.9 (d), 107.0 (d), 108.7 (d), 120.8 (d), 127.7 (d), 128.2 (d), 130.6 (d), 131.8 (d), 135.2 (s), 136.9 (s), 139.9 (s), 152.2 (s), 155.7 (s); HRMS C<sub>25</sub>H<sub>39</sub>NO<sub>3</sub>Si + H<sup>+</sup> calcd. *m/z* 430.2772, found *m/z* 430.2782.

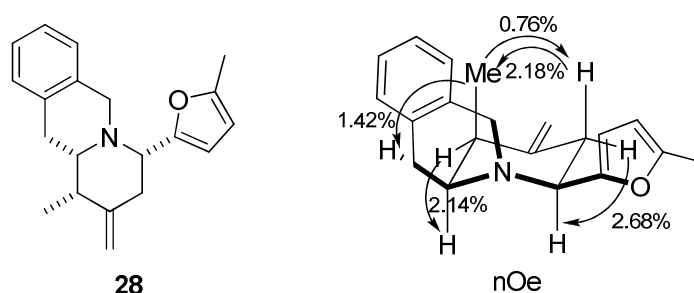

**(1S\*,4S\*,11aS\*)-1-methyl-2-methylene-4-(5-methylfuran-2-yl)-2,3,4,6,11,11a-hexahydro-1H-pyrido[1,2-b]isoquinoline (28):** To a solution of 50 mg (0.12 mmol) of imine **27** in 5 mL of THF was added 1.0 mL (1.0 mmol) of 1N HCl aqueous solution at rt under argon. The reaction was warmed to 50 °C with stirring for 16 h, and then was

quenched by addition of 0.15 g (1.1 mmol) of pulverized  $K_2CO_3$ . The neutralized mixture was extracted with 2 x 10 mL of diethyl ether. The organic extracts were dried ( $MgSO_4$ ), and concentrated *in vacuo* to afford a pale yellow oil. The residue was purified by chromatography over 20 g of silica gel (hexanes-ethyl acetate, 40:1) to give 28 mg (81%) of quinolizidine **28** as a yellow oil. No evidence for the presence of a minor isomer was found in the  $^1H$  NMR of the crude material. Stereochemistry was assigned by nOe. Data for quinolizidine **28**: IR (neat) 3385, 2960, 1644, 1455  $cm^{-1}$ ;  $^1H$  NMR ( $CDCl_3$ , 400 MHz)  $\delta$  1.29 (d,  $J$  = 6.8 Hz, 3H,  $CH_3$ ), 2.23 (dd,  $J$  = 13.6 Hz, 3.2 Hz, 1H, C(3) $H_2$ ), 2.30 (s, 3H,  $CH_3$ ), 2.50 (qd,  $J$  = 6.8, 3.6 Hz, 1H, C(1)H), 2.61 (m, 1H, C(10)H), 2.65 (dd,  $J$  = 6.4, 4.4 Hz, 1H, C(9) $H_2$ ), 2.92 (dd,  $J$  = 13.6, 12.4 Hz, 1H, C(3) $H_2$ ), 3.12 (m, 1H, C(9) $H_2$ ), 3.14 (dd,  $J$  = 12.4, 3.2 Hz, 1H, C(4)H), 3.21 and 3.85 (ABq,  $J$  = 15.6 Hz, 2H,  $NCH_2$ ), 4.66 (s, 1H,  $=CH_2$ ), 4.77 (s, 1H,  $=CH_2$ ), 5.92 (s, 1H, furan), 6.13 (s, 1H, furan), 6.90 (m, 1H, benzene), 7.08 (m, 3H, benzene);  $^{13}C$  NMR ( $CDCl_3$ , 100 MHz)  $\delta$  13.8 (q), 14.5 (q), 33.0 (t), 36.7 (t), 41.7 (d), 56.6 (t), 62.0 (d), 65.4 (d), 105.8 (d), 106.5 (t), 107.9 (d), 125.5 (d), 126.1 (d), 127.8 (d), 133.8 (s), 133.9 (s), 150.7 (s), 151.6 (s), 153.7 (s); LRMS  $C_{21}H_{29}NSi + H^+$  calcd.  $m/z$  294.2, found  $m/z$  294.5.

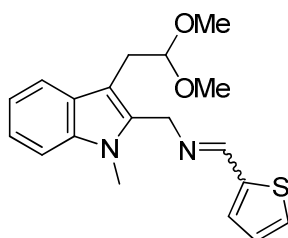

**29**

**1-(3-(2,2-dimethoxyethyl)-1-methyl-1H-indol-2-yl)-N-(thiophen-2-ylmethylene)methan-**

**amine (29):** IR (in  $CHCl_3$ ) 3054, 2929, 1673, 1633, 1471  $cm^{-1}$ ;  $^1H$  NMR ( $CDCl_3$ , 400 MHz)  $\delta$  3.10 (d,  $J$  = 5.6 Hz, 2H,  $CH_2$ ), 3.34 (s, 6H,  $CH(OMe)_2$ ), 3.77 (s, 3H,  $NMe$ ), 4.55 (t,  $J$  = 5.6 Hz, 1H,  $CH(OMe)_2$ ), 5.03 (s, 2H,  $=NCH_2$ ), 7.05 (m, 1H), 7.17 (m, 1H), 7.24 (m, 2H), 7.35 (m, 1H), 7.40 (m, 1H), 7.66 (m, 1H), 8.24 (s, 1H,  $CH=NR$ );  $^{13}C$  NMR ( $CDCl_3$ , 100 MHz)  $\delta$  29.3 (t), 30.1 (q), 52.0 (t), 54.1 (q), 105.5 (d), 109.08 (d), 109.11 (s), 118.9 (d),

119.0 (d), 121.6 (d), 127.4 (d), 127.6 (s), 129.0 (d), 130.6 (d), 134.2 (s), 137.0 (s), 142.8 (s), 155.5 (d); LRMS  $C_{19}H_{22}N_2O_2S + H^+$  calcd.  $m/z$  343.1, found  $m/z$  343.3.

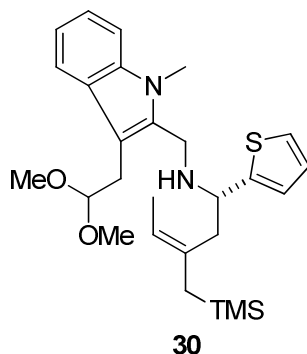

**(E)-N-((3-(2,2-dimethoxyethyl)-1-methyl-1H-indol-2-yl)methyl)-1-(thiophen-2-yl)-3-((trimethylsilyl)methyl)pent-3-en-1-amine (30):** To a solution of 295 mg (0.86 mmol) of imine **29** in 10 mL of dry diethyl ether was added 0.39 mL (1.29 mmol) of  $Ti(O^iPr)_4$  via a syringe at rt under argon. After stirring for 10 min, the solution was cooled to  $-78\text{ }^\circ\text{C}$ , and 1.29 mL (2.58 mmol) of 2.0 M  $c\text{-}C_5H_9MgCl$  in diethyl ether was added via a syringe over 2 min. The solution turned from yellow to dark brown after stirring at  $-78\text{ }^\circ\text{C}$  for 1.5 h. Next, a solution of lithium alkoxide of alcohol **8** in 2 mL of THF, prepared by deprotonation of 201 mg (1.29 mmol) of alcohol **8** at  $-78\text{ }^\circ\text{C}$  with 0.55 mL (1.37 mmol) of 2.5 M  $n\text{-}BuLi$  in hexanes followed by 10 min stirring, was added to the brown solution via cannula. The mixture was slowly warmed to room temperature, and stirred for 16 h. The reaction was quenched by sequential addition of 10 mL of ethyl ether and 5 mL of saturated aqueous  $NaHCO_3$ , followed by vigorous stirring for 1 h. The aqueous phase was extracted with two portions of 10 mL of diethyl ether. The organic extracts were combined, dried ( $MgSO_4$ ), and concentrated *in vacuo* to afford a pale yellow oil. The residue was purified by chromatography over 50 g of silica gel (hexanes-ethyl acetate, 20:1) to give 290 mg (70%) of homoallylic amine **30** as a yellow oil. No evidence for the presence of a minor isomer was observed in the  $^1H$  NMR of the crude material. Stereochemistry was assigned by analogy to previous examples.<sup>4</sup> Data for amine **30**: IR (neat) 3584, 2952, 1614, 1471  $cm^{-1}$ ;  $^1H$  NMR ( $CDCl_3$ , 400 MHz)  $\delta$  0.00 (s, 9H, TMS), 1.35 and 1.43 (ABq,  $J = 14.8$  Hz, 2H,  $CH_2TMS$ ), 1.50 (d,  $J = 6.8$  Hz, 3H,  $CH_3CH=$ ), 1.74

(br, 1H, NH), 2.30 (dd,  $J = 13.2, 6.4$  Hz, 1H,  $\text{CH}_2\text{CHN}$ ), 2.57 (dd,  $J = 13.2, 8.0$  Hz, 1H,  $\text{CH}_2\text{CHN}$ ), 3.03 (dd,  $J = 6.0, 2.4$  Hz, 2H,  $\text{CH}_2\text{CH}(\text{OMe})_2$ ), 3.34 (s, 3H,  $\text{CH}(\text{OMe})_2$ ), 3.35 (s, 3H,  $\text{CH}(\text{OMe})_2$ ), 3.77 (s, 3H,  $\text{NCH}_3$ ), 3.81 (s, 2H,  $\text{NHCH}_2\text{Ph}$ ), 4.20 (dd,  $J = 7.2, 7.2$  Hz, 1H,  $\text{CHN}$ ), 4.52 (t,  $J = 5.2$  Hz, 1H,  $\text{CH}(\text{OMe})_2$ ), 5.16 (q,  $J = 6.8$  Hz, 1H,  $=\text{CHCH}_3$ ), 6.99 (m, 2H), 7.09 (m, 1H), 7.22 (m, 1H), 7.30 (m, 1H), 7.61 (m, 1H); LRMS  $\text{C}_{27}\text{H}_{40}\text{N}_2\text{O}_2\text{SSi} + \text{H}^+$  calcd.  $m/z$  485.3, found  $m/z$  485.4.

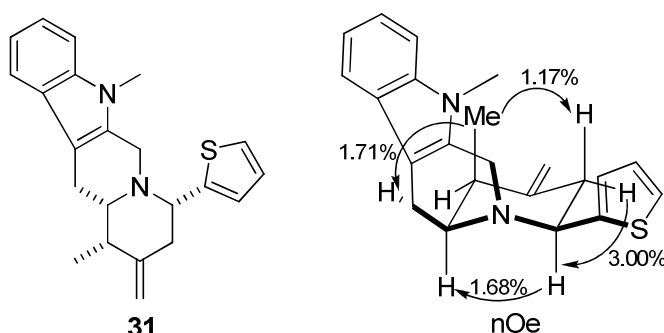

**(8S\*,11S\*,11aS\*)-5,11-dimethyl-10-methylene-8-(thiophen-2-yl)-5,6,8,9,10,11,11a,12-octahydroindolo[3,2-b]quinolizidine (31):** To a solution of 56 mg (0.12 mmol) of imine **30** in 5 mL of THF was added 0.5 mL (0.5 mmol) of 1N HCl aqueous solution at rt under argon. After stirring for 16 h, the reaction was quenched by addition of 0.15 g (1.1 mmol) of pulverized  $\text{K}_2\text{CO}_3$ . The neutralized mixture was extracted with 2 x 10 mL of diethyl ether. The organic extracts were dried ( $\text{MgSO}_4$ ), and concentrated *in vacuo* to afford a pale yellow gel. The residue was purified by chromatography over 30 g of silica gel (hexanes-ethyl acetate, 40:1) to give 26 mg (75%) of quinolizidine **31** as a white solid. No evidence for the presence of a minor isomer was found in the  $^1\text{H}$  NMR of the crude material. Stereochemistry was assigned by nOe. IR (in  $\text{CHCl}_3$ ) 3585, 2919, 1660, 1471  $\text{cm}^{-1}$ ;  $^1\text{H}$  NMR ( $\text{CDCl}_3$ , 400 MHz)  $\delta$  1.29 (d,  $J = 6.8$  Hz, 3H,  $\text{CH}_3$ ), 2.29 (dd,  $J = 13.6$  Hz, 2.8 Hz, 1H,  $\text{C}(3)\text{H}_2$ ), 2.55 (qd,  $J = 6.4, 2.8$  Hz, 1H,  $\text{C}(1)\text{H}$ ), 2.70 (dd,  $J = 14.8, 3.6$  Hz, 1H, m  $\text{C}(9)\text{H}_2$ ), 2.75 (m, 1H,  $\text{C}(10)\text{H}$ ), 2.80 (dd,  $J = 13.6, 12.0$  Hz, 1H,  $\text{C}(3)\text{H}_2$ ), 3.04 (dd,  $J = 12.4, 10.4$  Hz,  $\text{C}(9)\text{H}_2$ ), 3.12 and 3.99 (ABq,  $J = 14.8$  Hz, 1H,  $\text{NC}(6)\text{H}_2$ ), 3.61 (dd,  $J = 11.6, 3.6$  Hz, 1H,  $\text{C}(4)\text{H}$ ), 4.60 (s, 1H,  $=\text{CH}_2$ ), 4.73 (s, 1H,  $=\text{CH}_2$ ), 6.89 (m, 1H, thiophene), 6.91 (m, 2H, thiophene), 6.98 (m, 1H, benzene), 7.14 (m, 1H, benzene),

7.18 (m, 1H, benzene), 7.38 (d,  $J = 7.2$  Hz, 1H, benzene);  $^{13}\text{C}$  NMR ( $\text{CDCl}_3$ , 100 MHz)  $\delta$  14.8 (q), 26.0 (t), 29.1 (q), 41.3 (t), 42.2 (d), 50.4 (t), 62.5 (d), 68.1 (d), 106.2 (t), 108.6 (d), 117.8 (d), 118.8 (d), 120.7 (d), 124.2 (d), 124.7 (d), 126.2 (d), 126.4 (s), 132.4 (s), 137.2 (s), 148.6 (s), 150.7 (s), (one quaternary  $^{13}\text{C}$  peak missing due to overlap); LRMS  $\text{C}_{22}\text{H}_{24}\text{NOS} + \text{H}^+$  calcd.  $m/z$  412.2, found  $m/z$  412.5.

---

1 Love, B. E.; Jones, E. G., *J. Org. Chem.* **1999**, *64*, 3755-3756.

2 Trost, B. M.; Chan, D. M. T.; Nanninga, T. N., *Org. Syn.* **1984**, *62*, 58.

3 Joly, G. D.; Jacobsen, E. N., *J. Am. Chem. Soc.* **2004**, *126*, 4102.

4 Takahashi, M.; McLaughlin, M.; Micalizio, G. C., *Angew. Chem. Int. Ed.* **2009**, *48*, 3648-3652

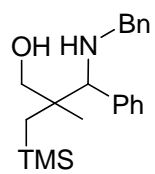

**7**  
**DY-1-143B**

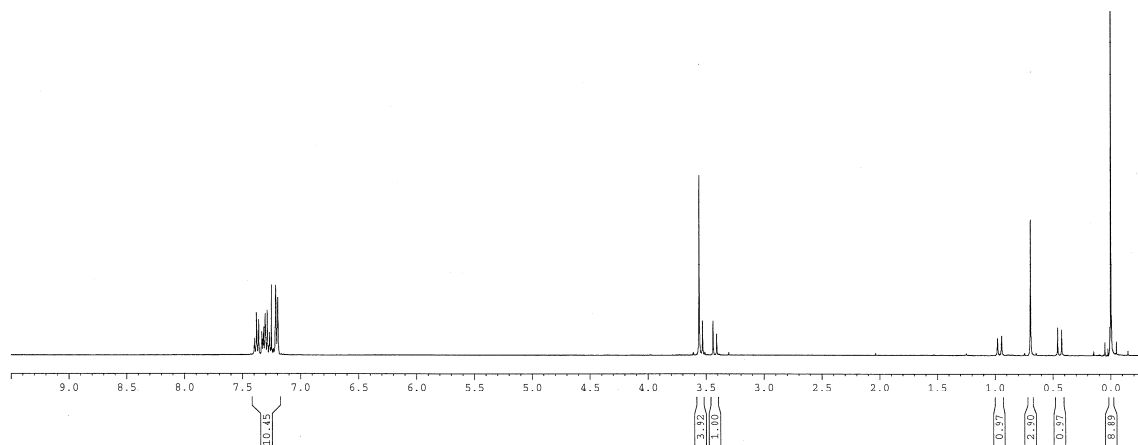

DY-1-143B-3 (C)

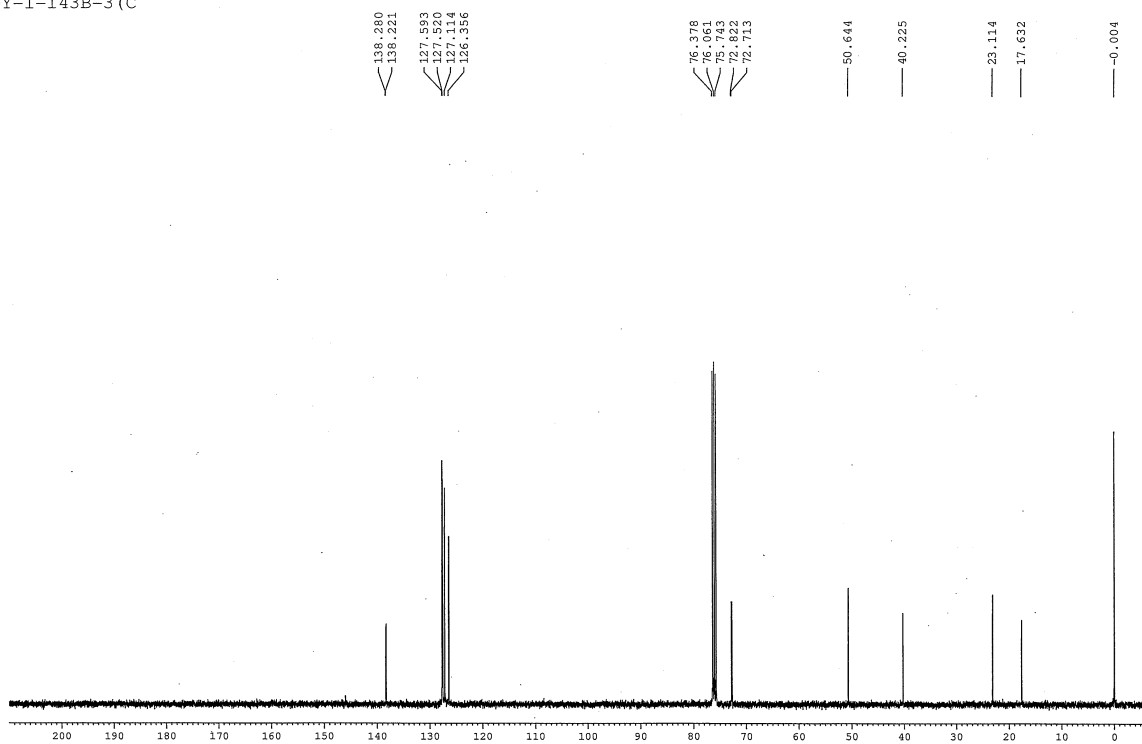

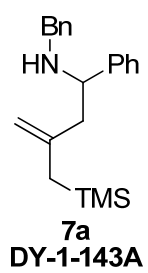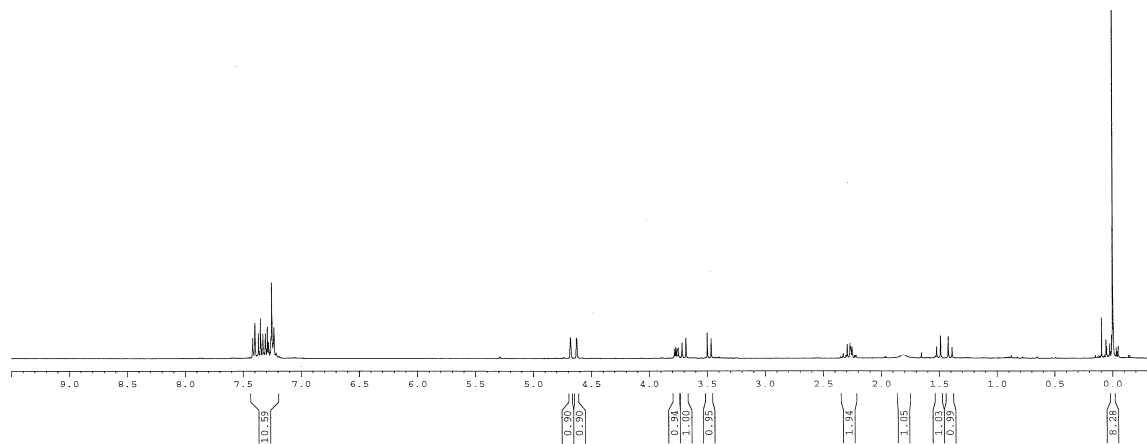

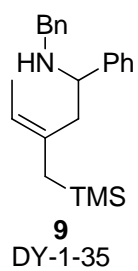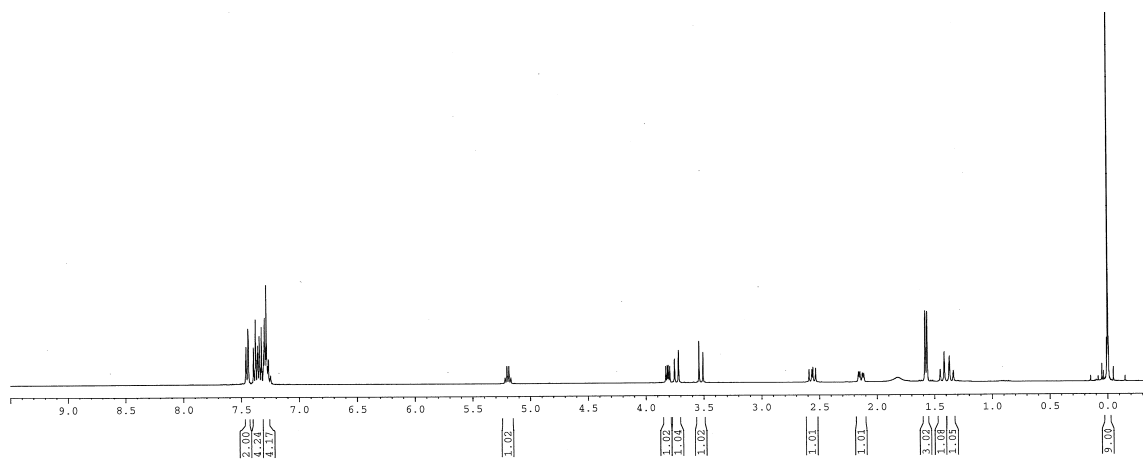

/20/09

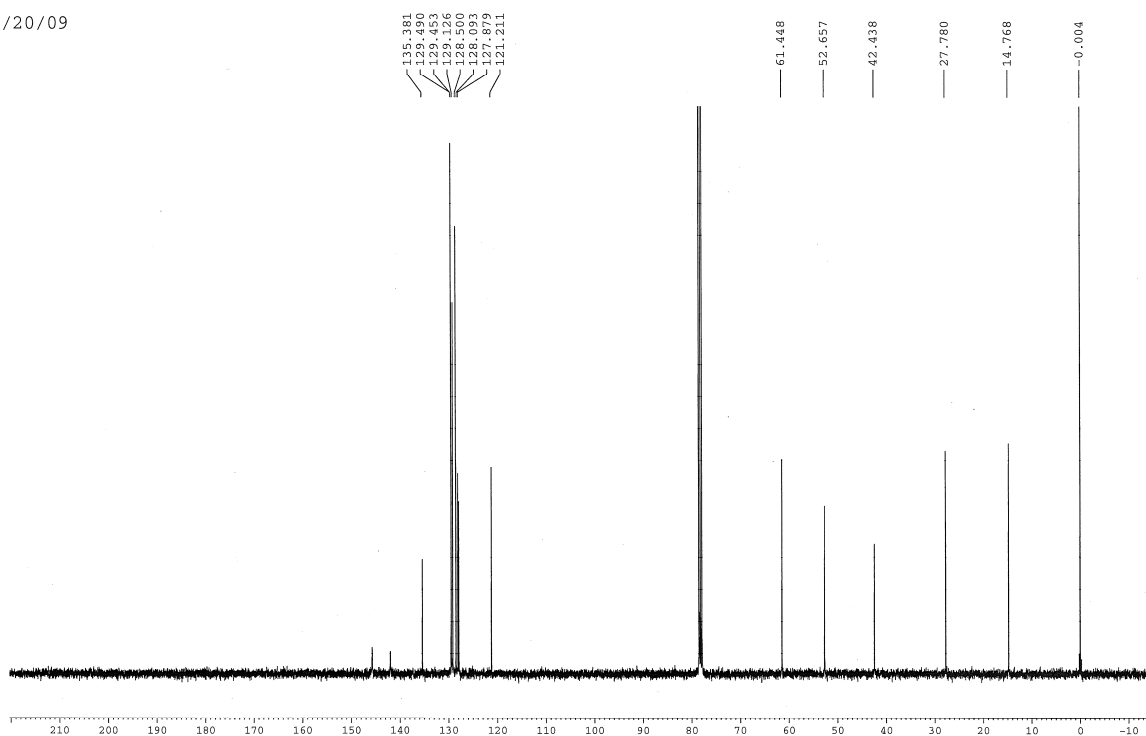

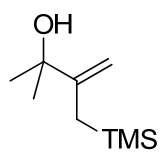

**10**  
DY-1-222B

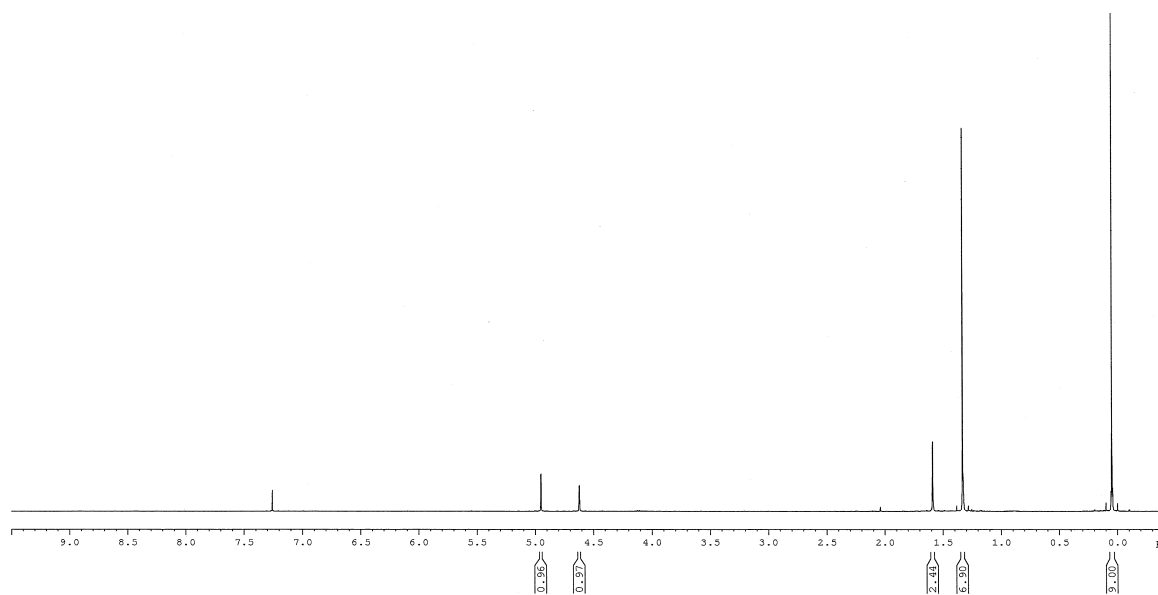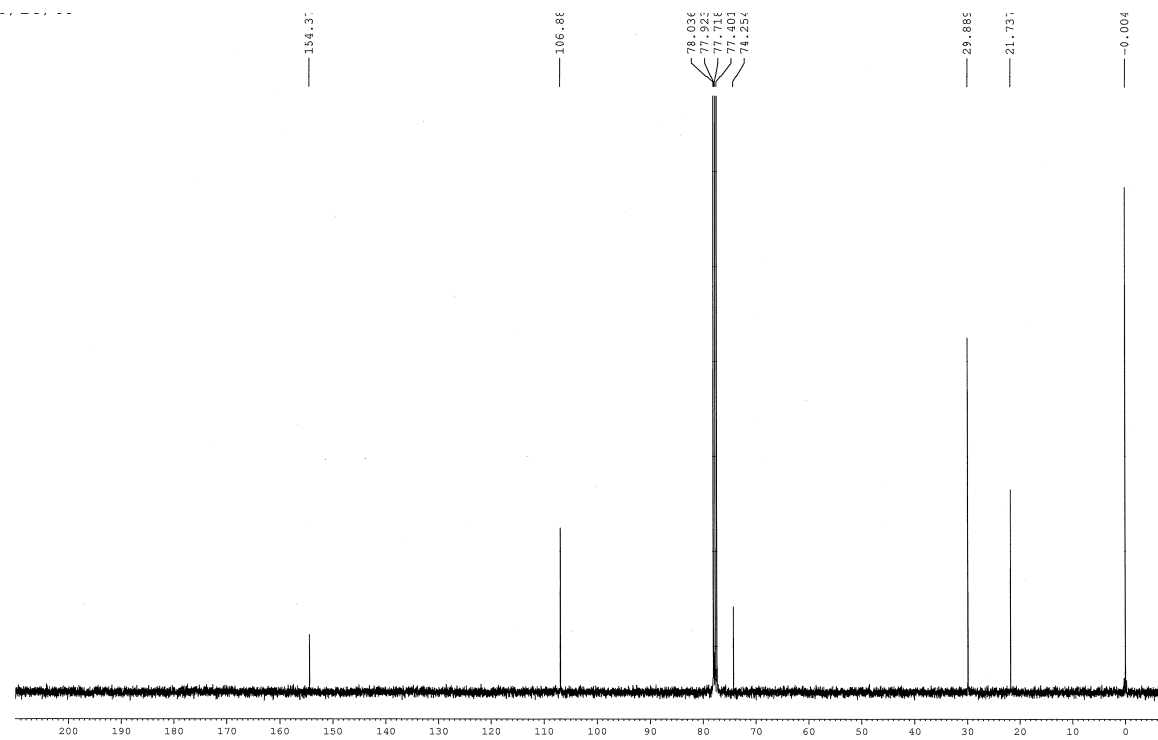

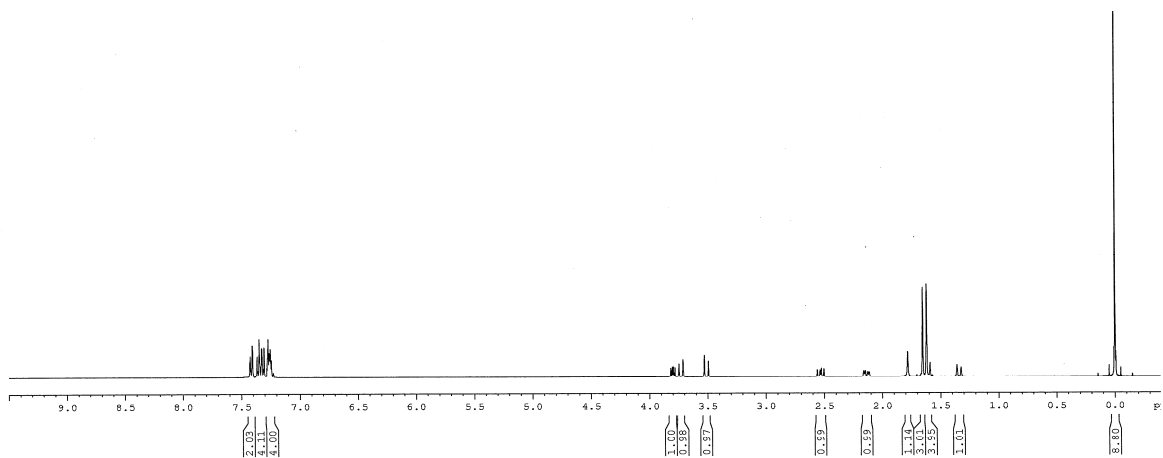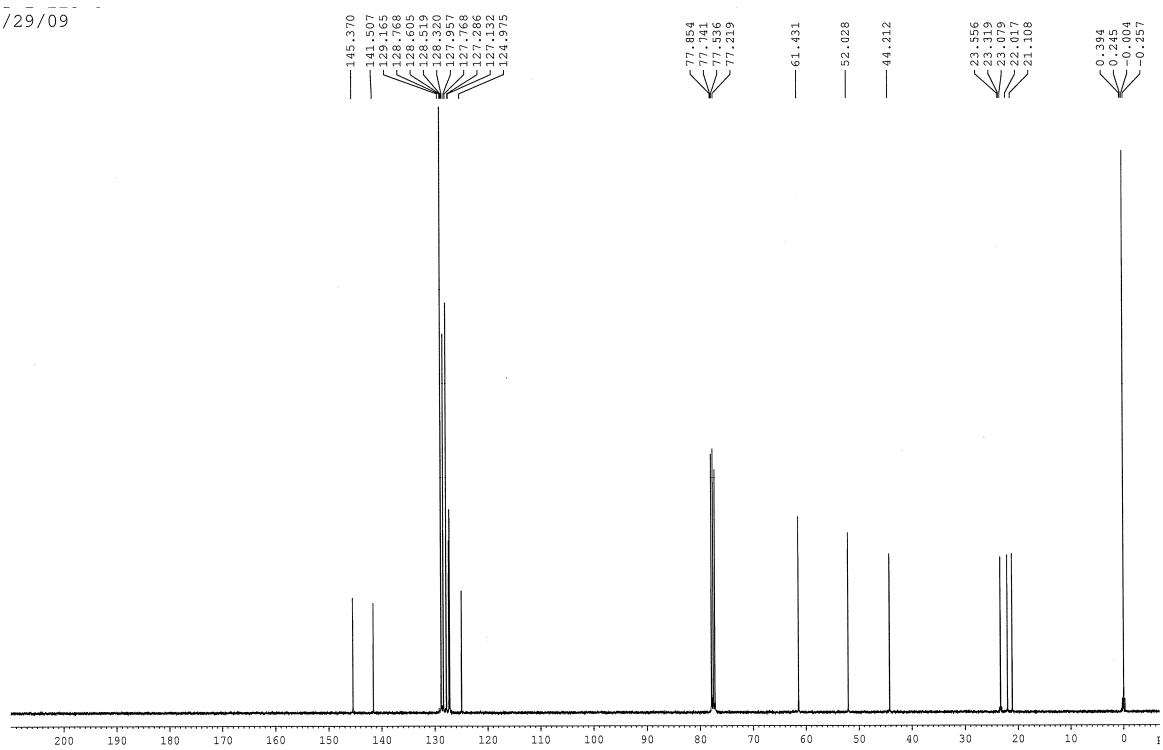

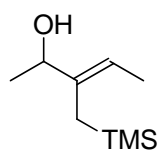

**12**  
DY-1-79

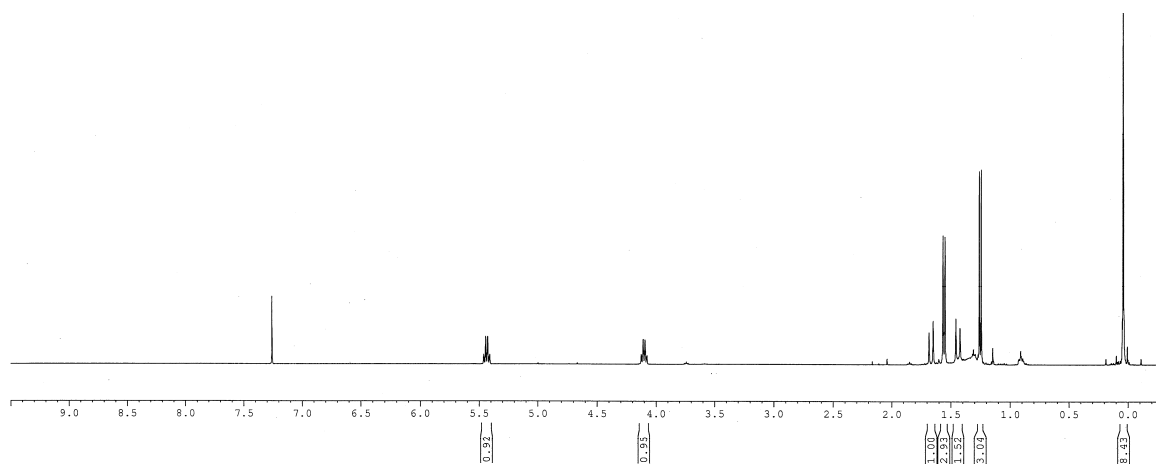

DY-1-79-C  
3/26/09  
C13CPD

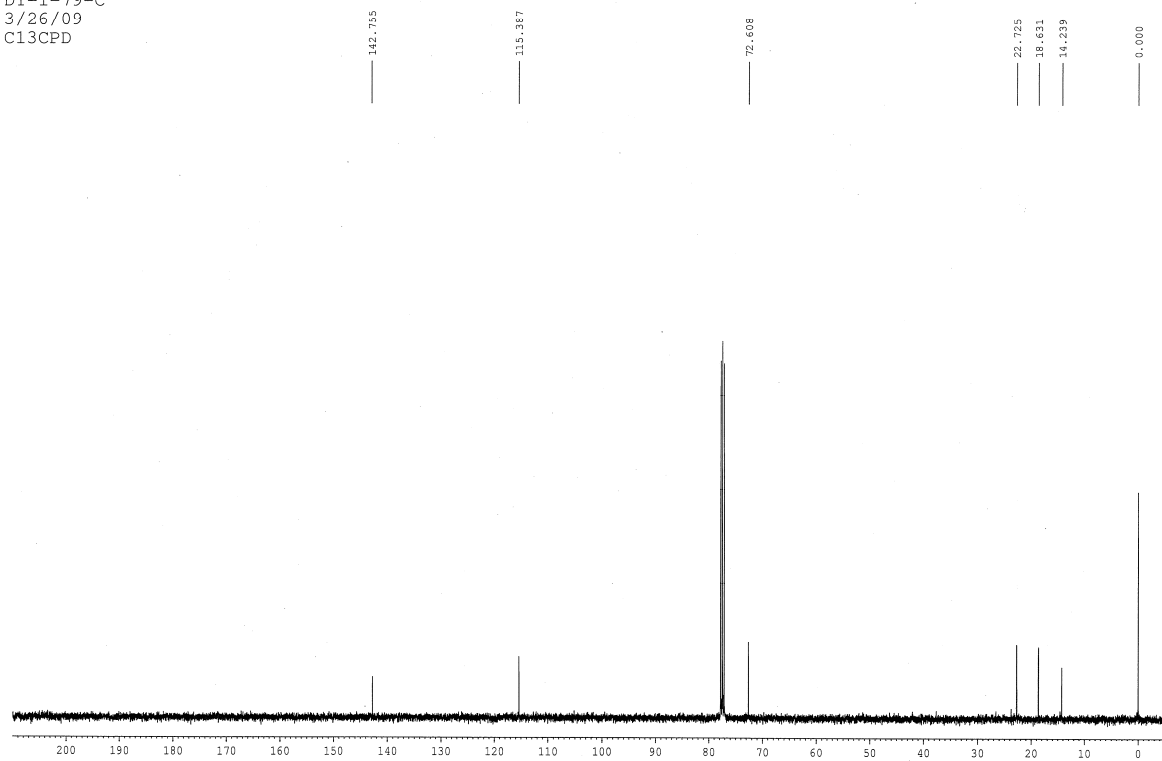

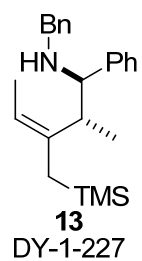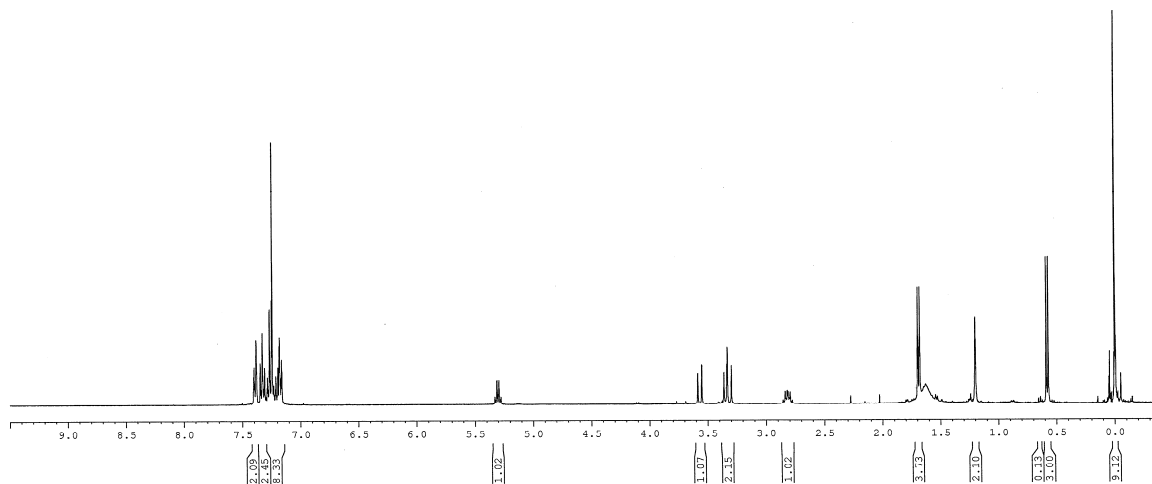

DY-1-227-C  
7/4/09

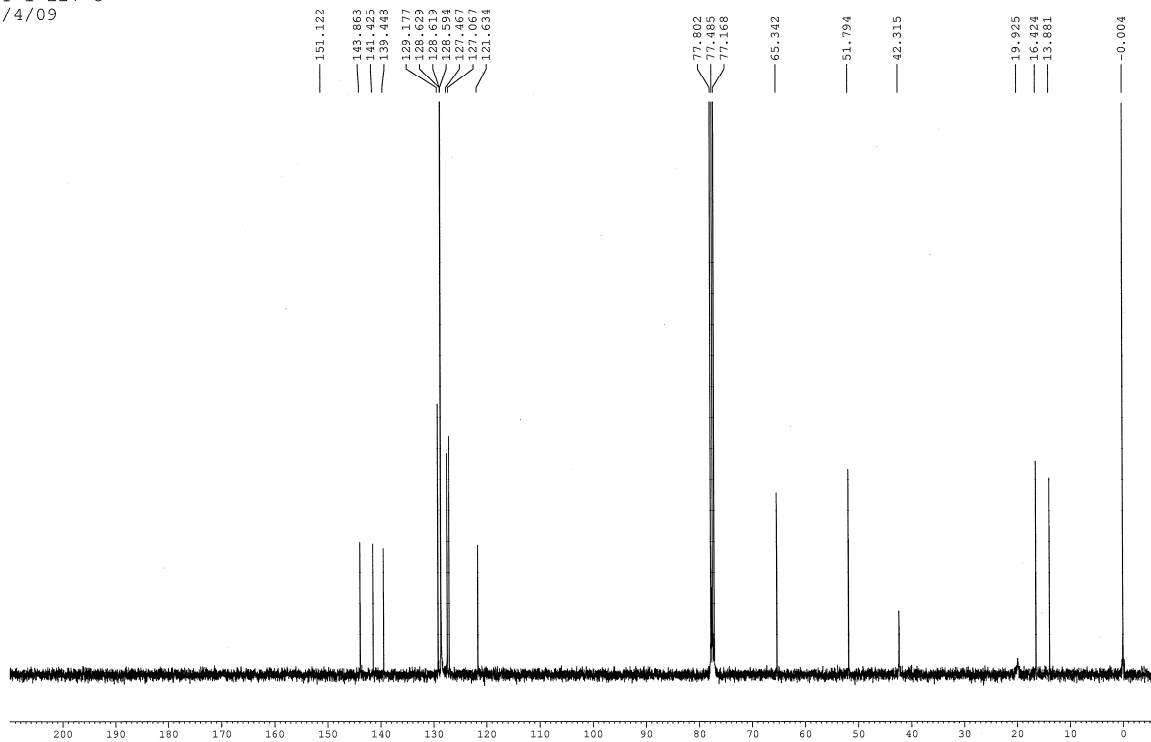

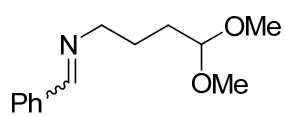

14

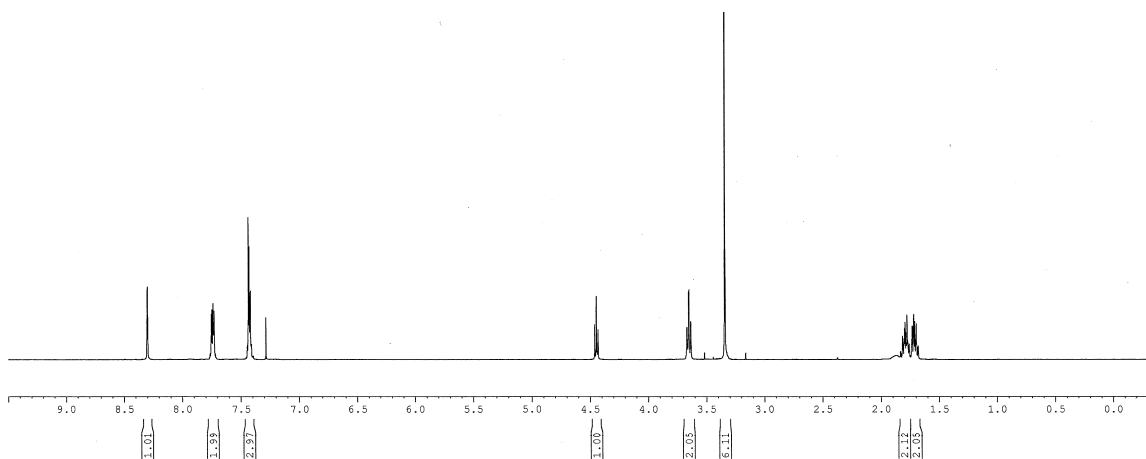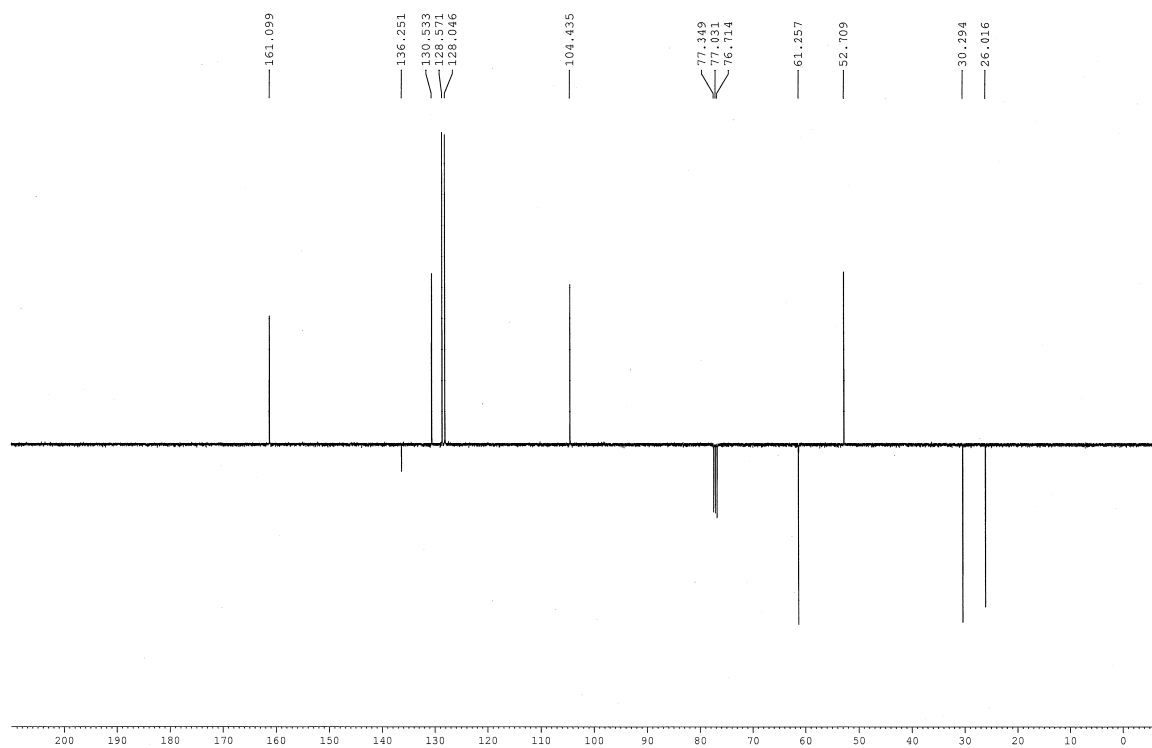

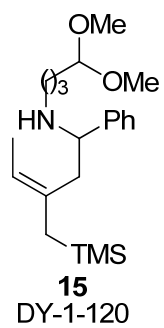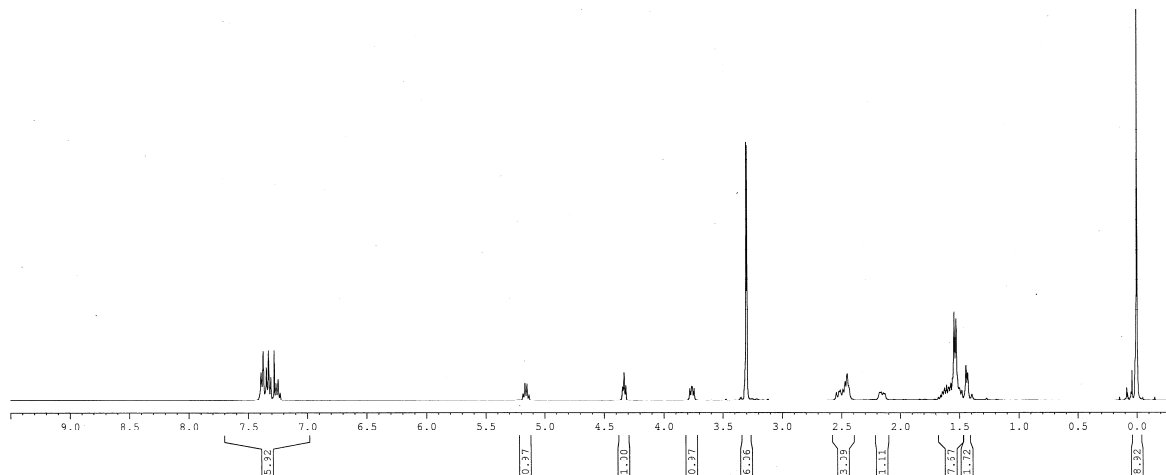

DY-1-120-C  
4/28/09

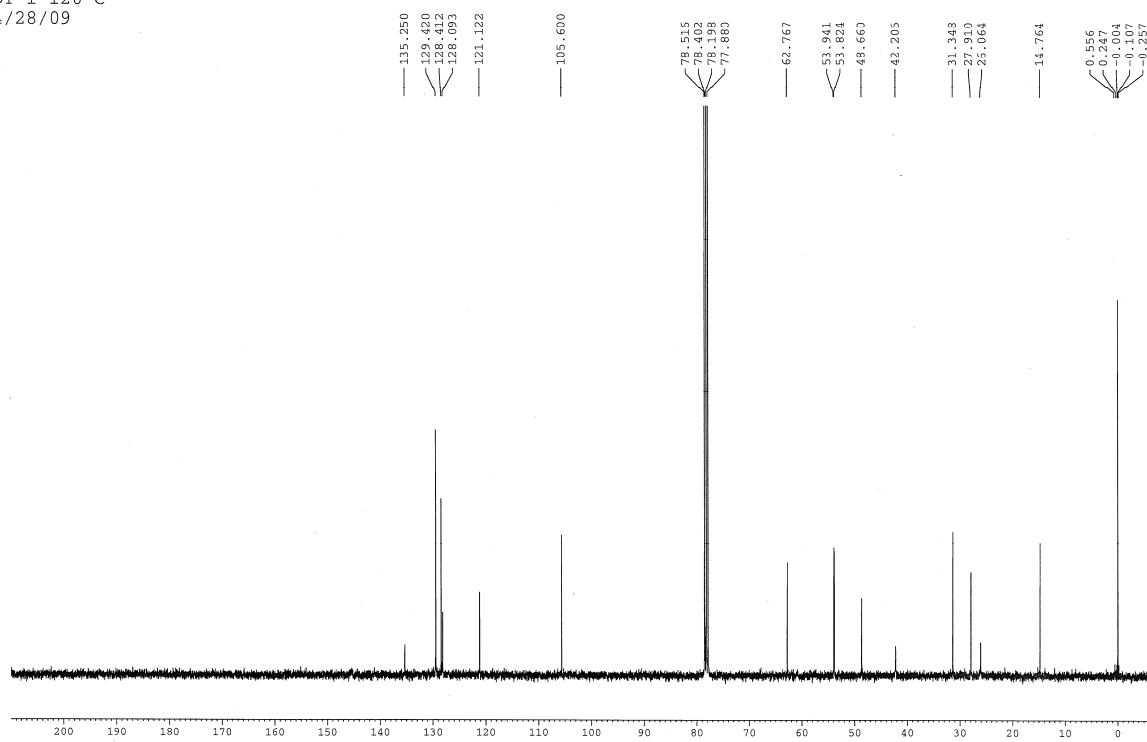

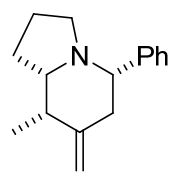

**16**  
DY-1-125

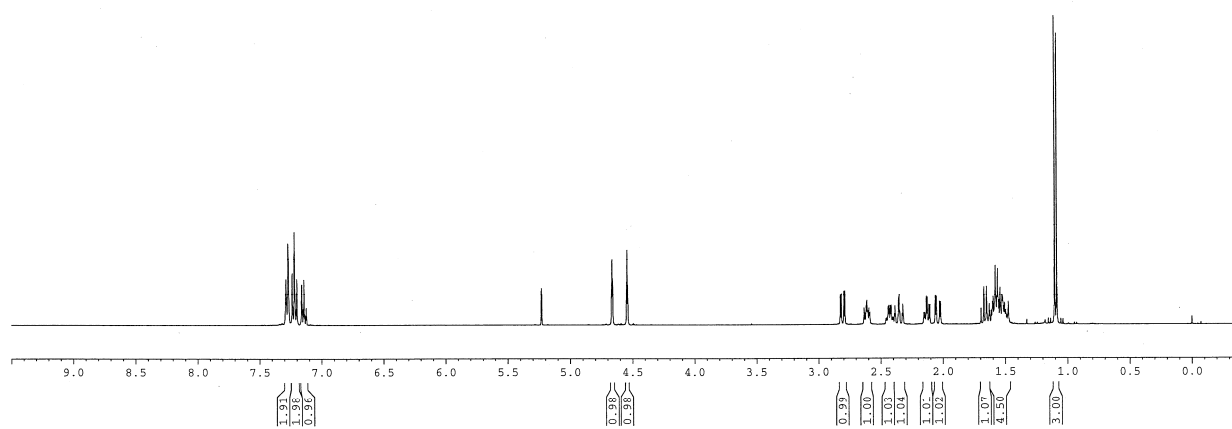

DY-1-125-C (DC  
4/29/09

152.959  
145.147  
128.623  
127.590  
127.297  
107.317  
70.642  
68.330  
54.357  
54.087  
53.817  
53.547  
53.277  
52.734  
40.707  
40.623  
26.593  
21.377  
13.405

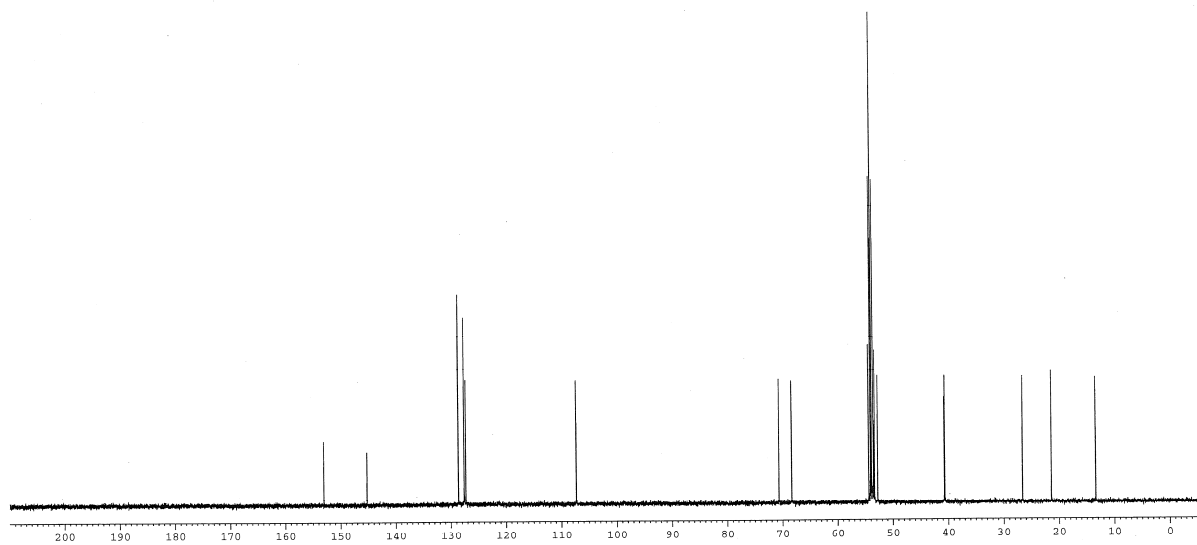

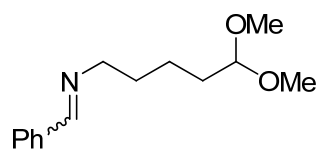

17

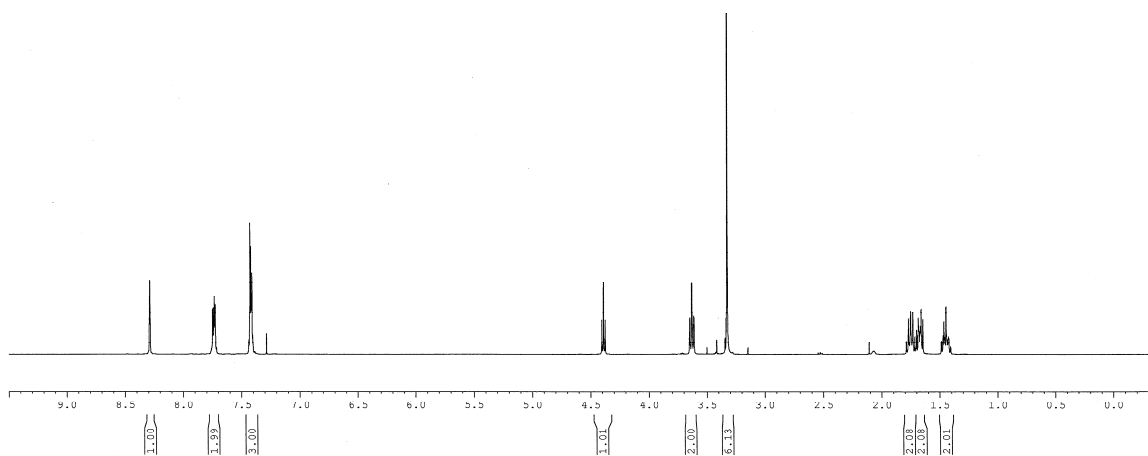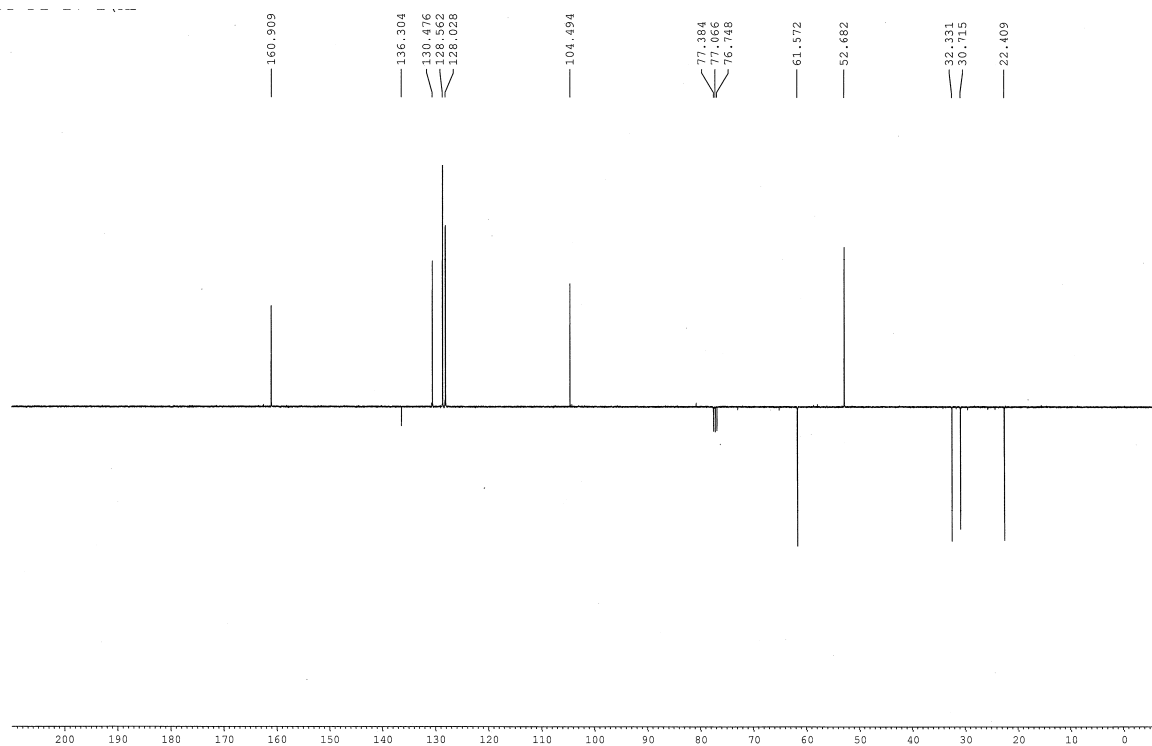

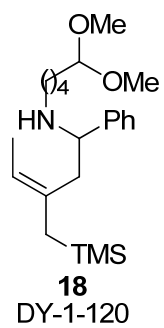

DY-1-120-C  
4/28/09

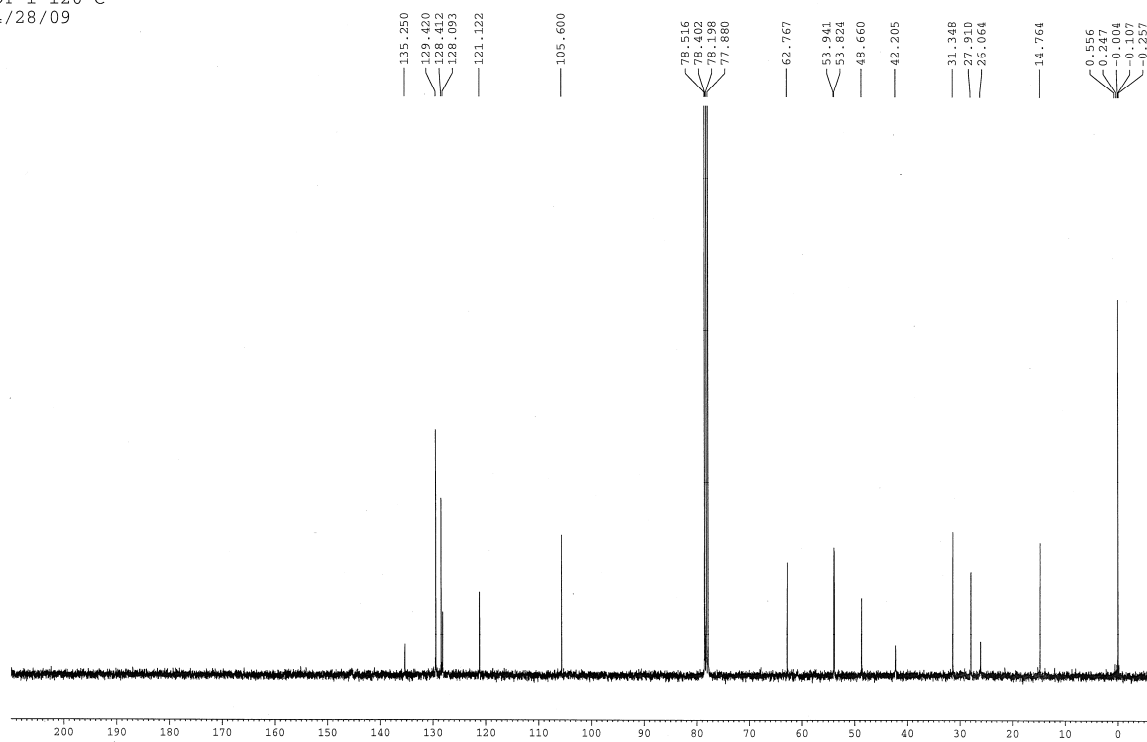

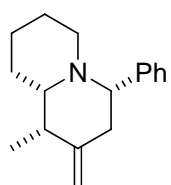

**19**  
DY-1-129

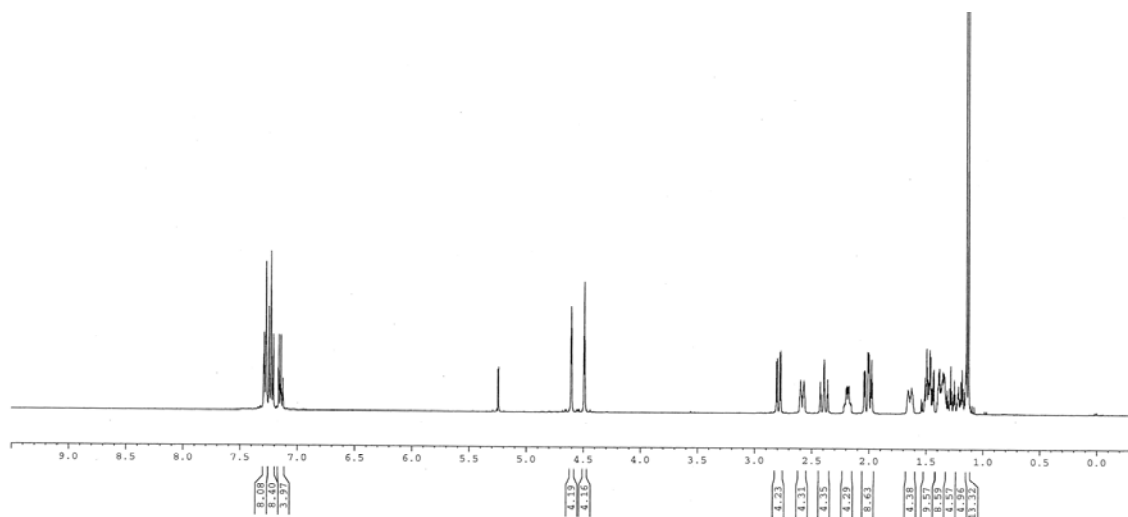

DY-1-129-C(DC  
5/3/09

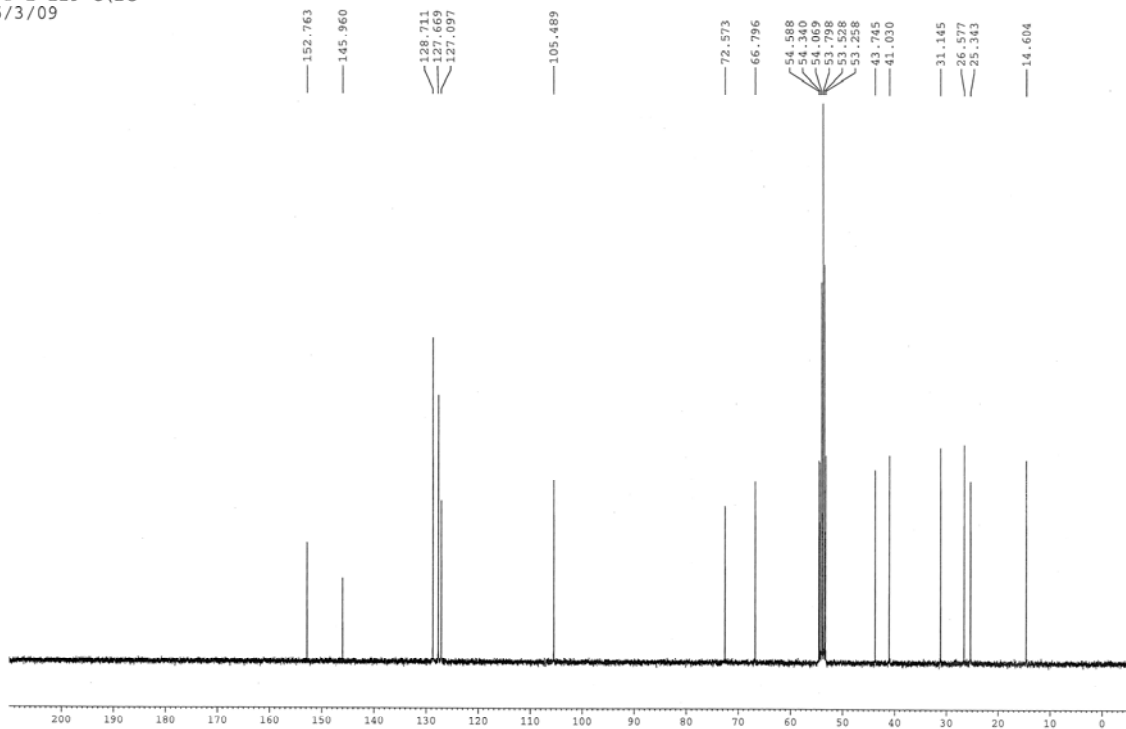

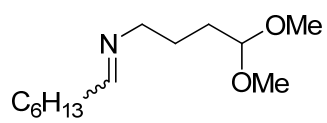

**20**  
DY-1-278

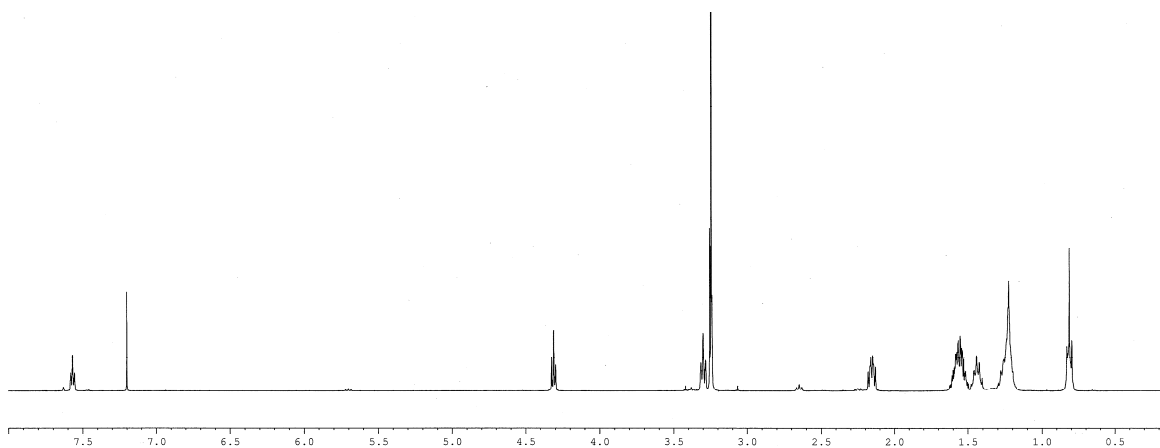

DY-1-278-12 (A)

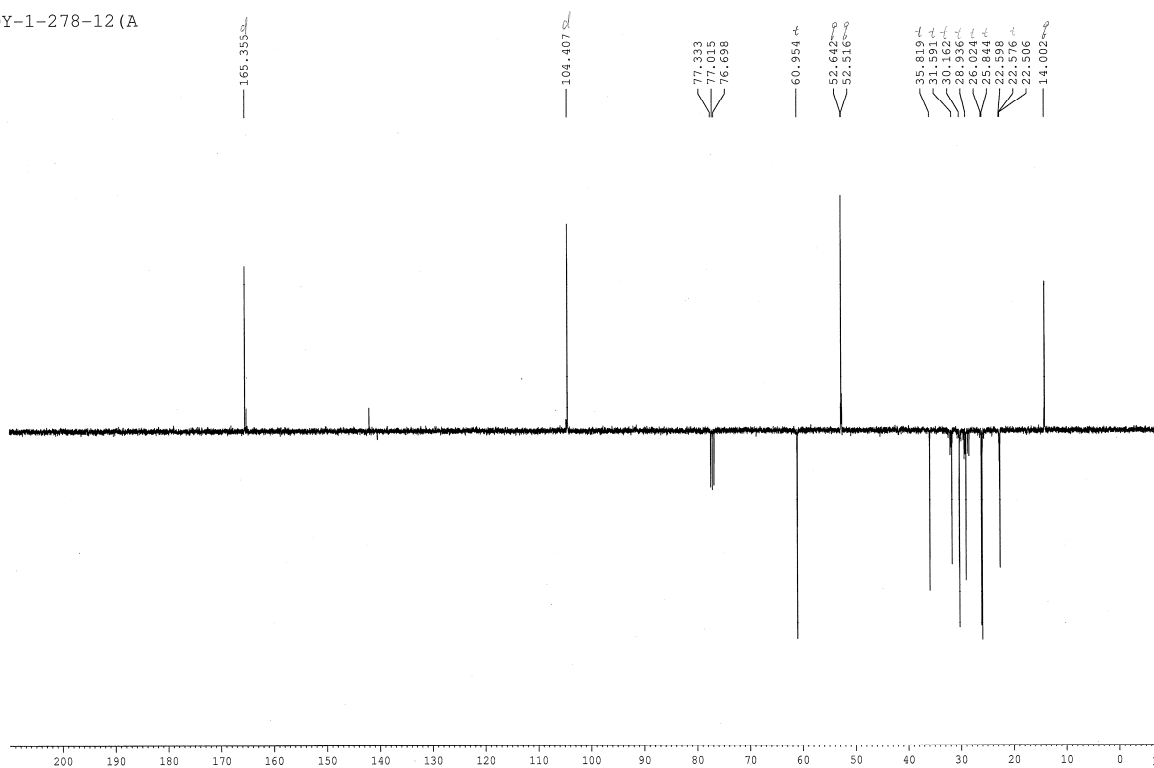

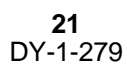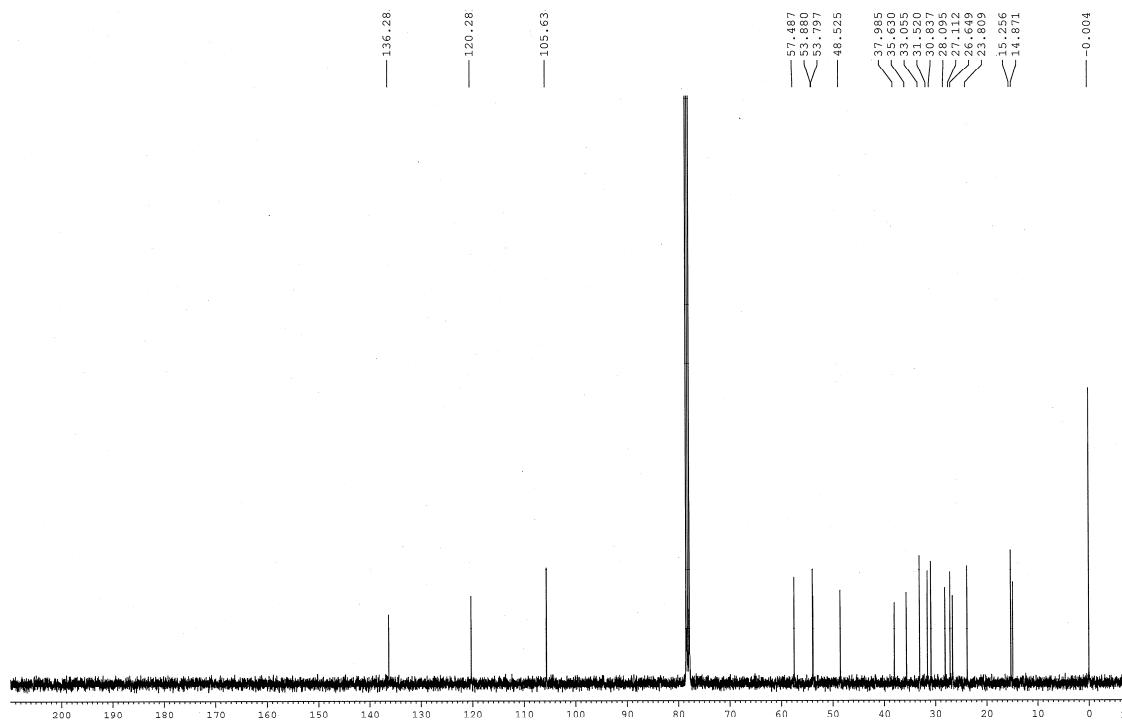

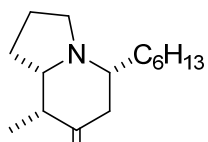

**22**  
DY-1-283

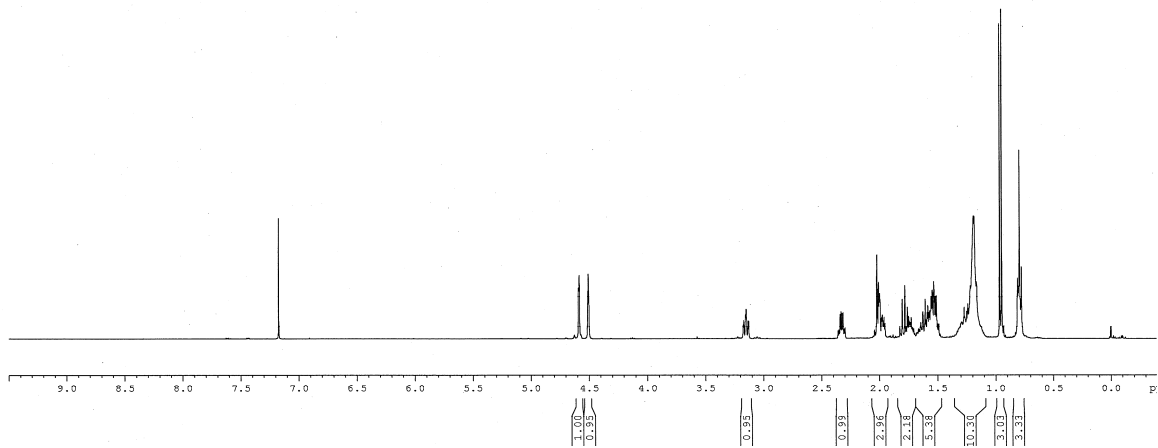

DY-1-283-4(C)

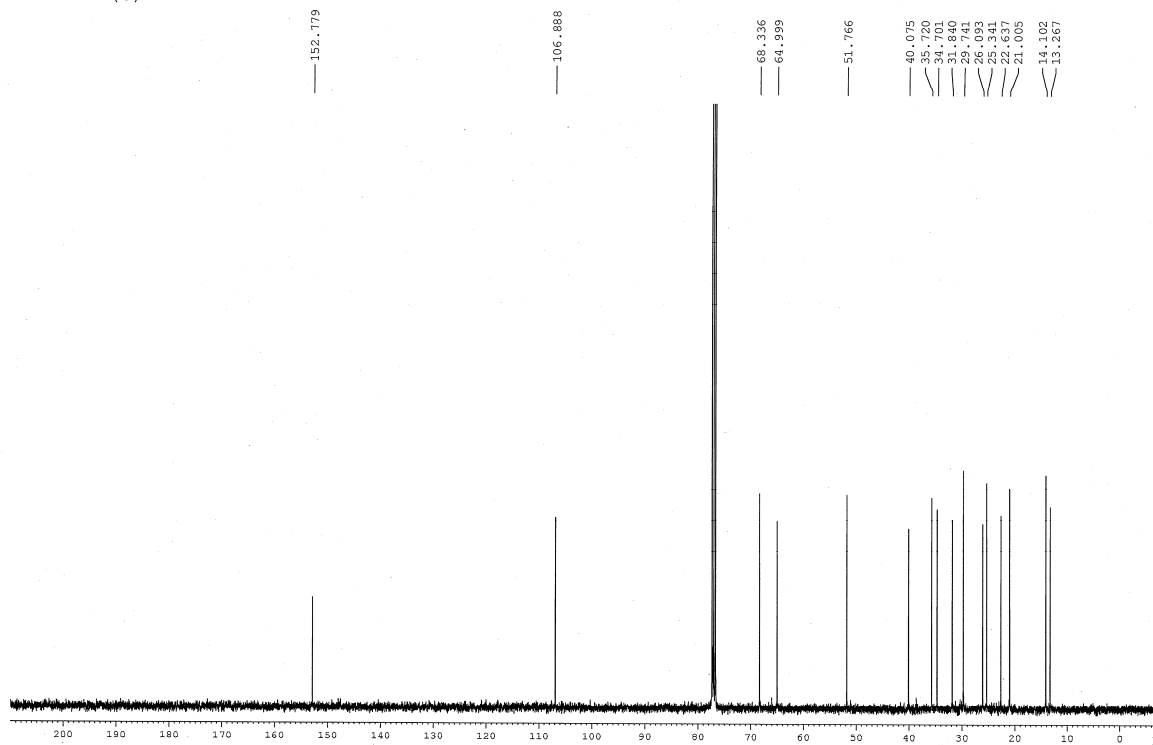

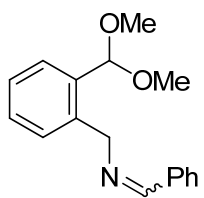

**23**  
DY-1-256

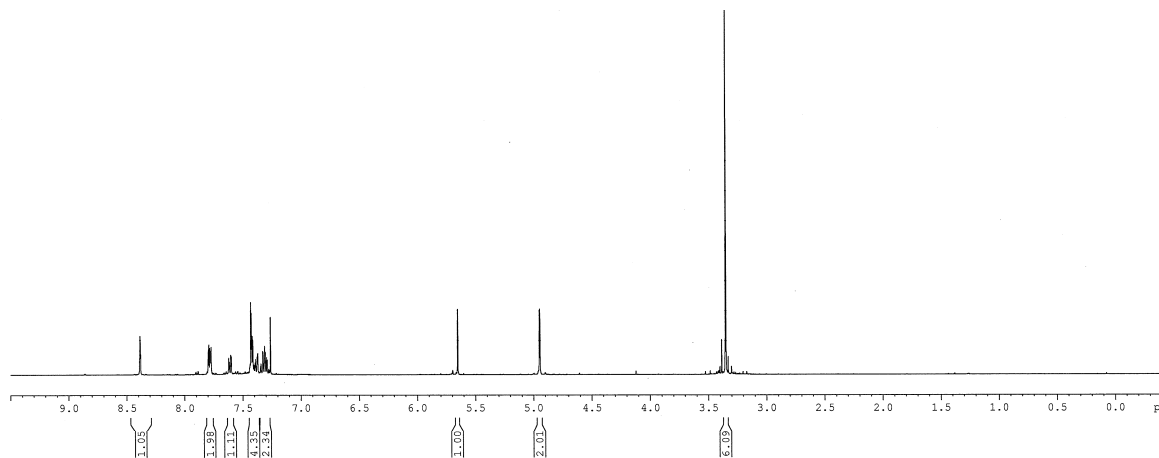

DY-1-256-3 (C)

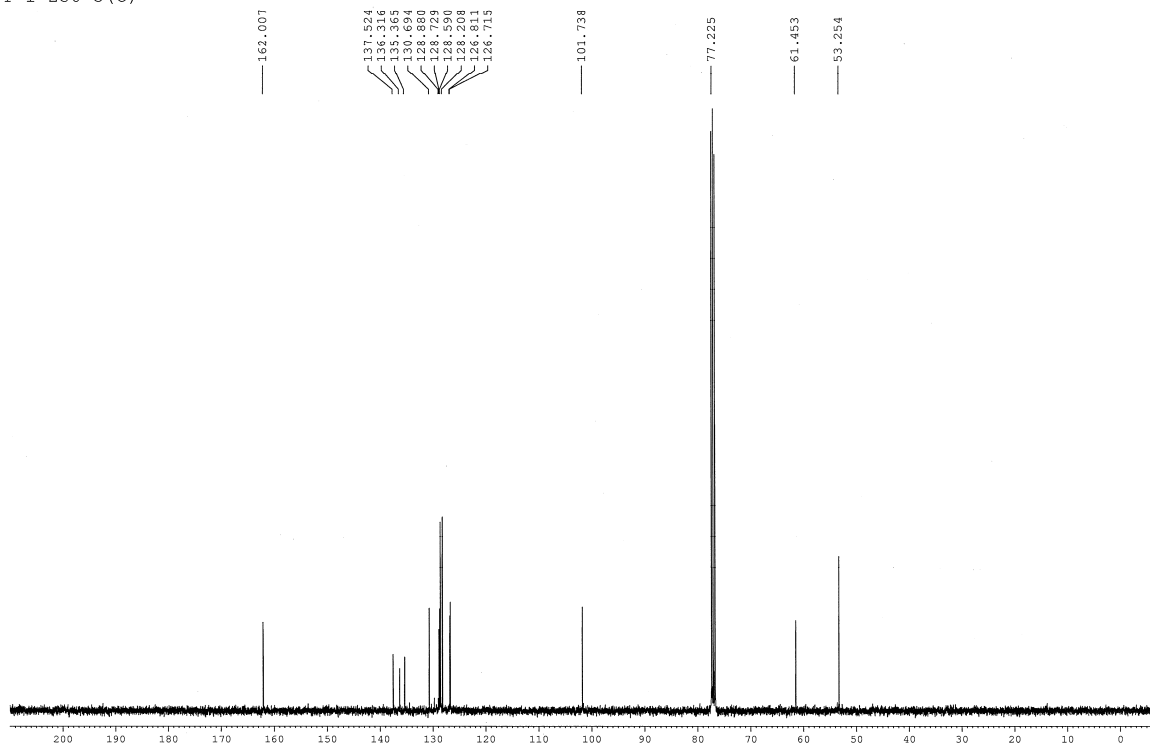

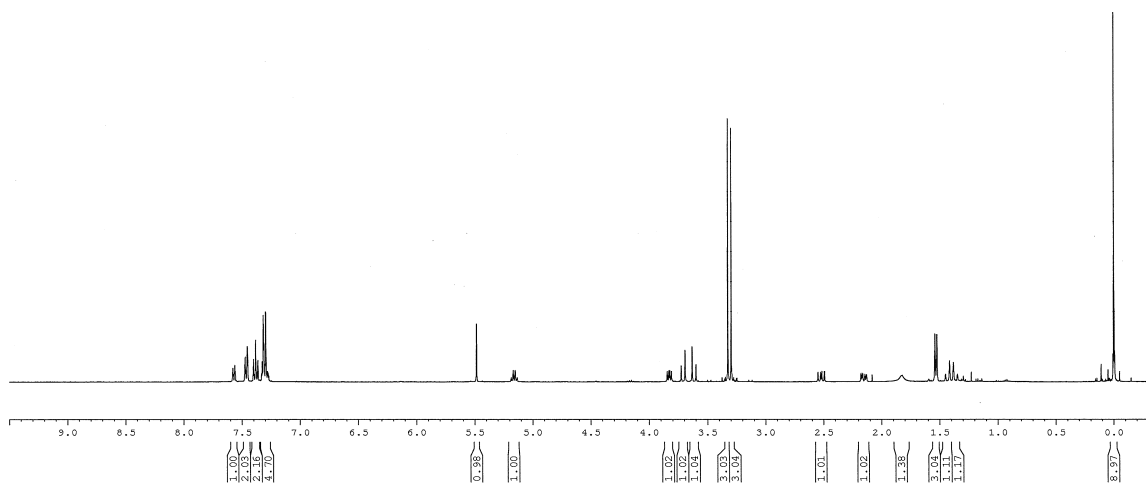

|         |         |         |         |         |         |         |         |         |         |        |        |        |        |        |        |        |       |
|---------|---------|---------|---------|---------|---------|---------|---------|---------|---------|--------|--------|--------|--------|--------|--------|--------|-------|
| 145.882 | 139.716 | 135.385 | 130.947 | 126.459 | 128.563 | 128.070 | 127.199 | 121.038 | 102.859 | 78.369 | 62.096 | 54.700 | 54.473 | 49.737 | 42.551 | 44.711 | 0.094 |
|---------|---------|---------|---------|---------|---------|---------|---------|---------|---------|--------|--------|--------|--------|--------|--------|--------|-------|

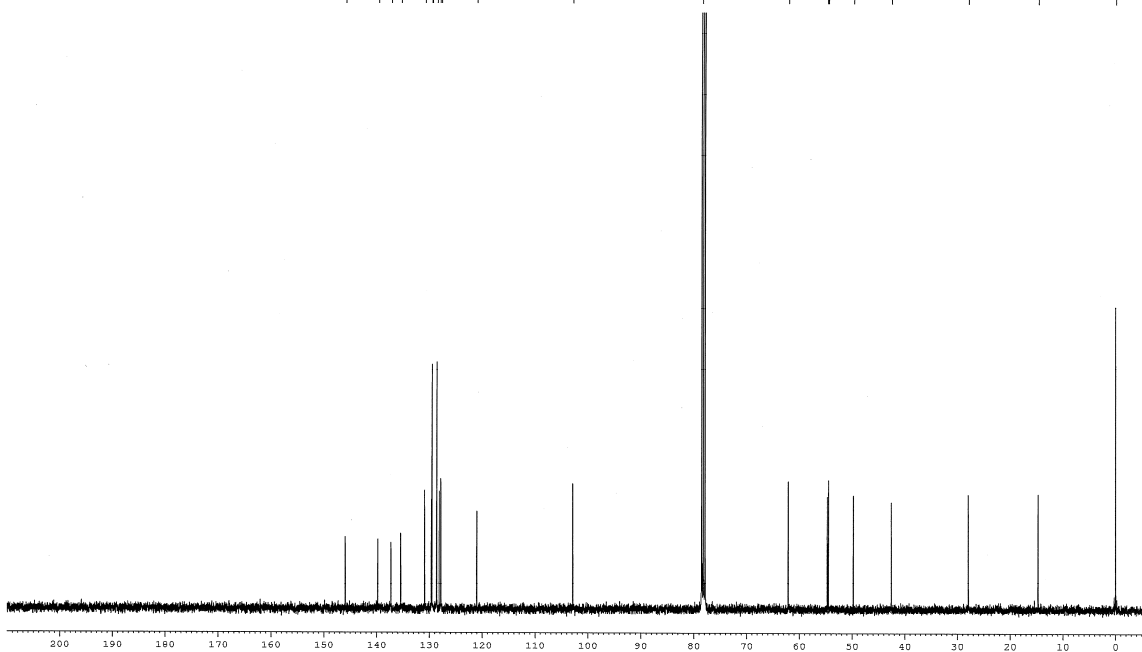

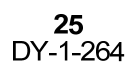

<sup>1</sup>H NMR spectrum of compound 10a in CDCl<sub>3</sub>. The spectrum shows peaks from 0.9 to 7.2 ppm. Integration values are provided below the baseline. A solvent peak for THF is indicated at approximately 3.6 ppm. The x-axis is labeled with chemical shift in ppm from 0 to 8.0.

| Chemical Shift (ppm)                                                                                                                                                                                                                                                                                               | Integration |
|--------------------------------------------------------------------------------------------------------------------------------------------------------------------------------------------------------------------------------------------------------------------------------------------------------------------|-------------|
| 7.156, 7.152, 7.149, 7.146, 7.116, 7.070, 7.052, 7.028, 7.010, 6.986, 6.999, 6.974, 6.957                                                                                                                                                                                                                          | 1.00        |
| 4.769, 4.764, 4.759, 4.610, 4.585, 4.560, 3.679, 3.648, 3.606, 3.599, 3.589, 3.583, 3.583, 3.579, 3.572, 3.524, 3.516, 3.509, 3.339, 3.330, 3.311, 3.303, 3.100, 3.022, 2.999, 2.991, 2.942, 2.935, 2.925, 2.918, 2.908, 2.901, 2.891, 2.883, 2.878, 2.454, 2.448, 2.425, 2.420, 2.156, 2.155, 2.157, 2.131, 2.122 | 0.97        |
| 1.036, 1.019                                                                                                                                                                                                                                                                                                       | 0.97        |

S41

DY-1-264-14(C

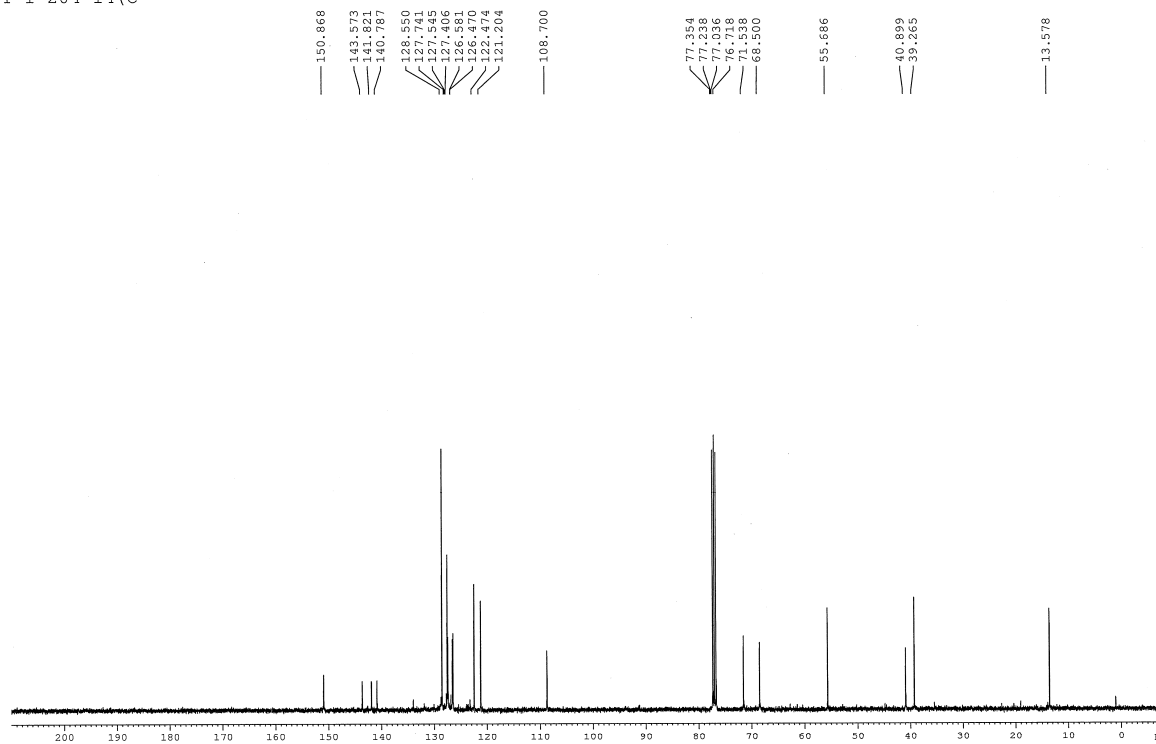

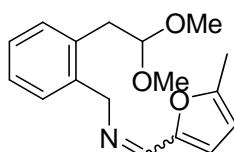

**26**  
DY-1-271

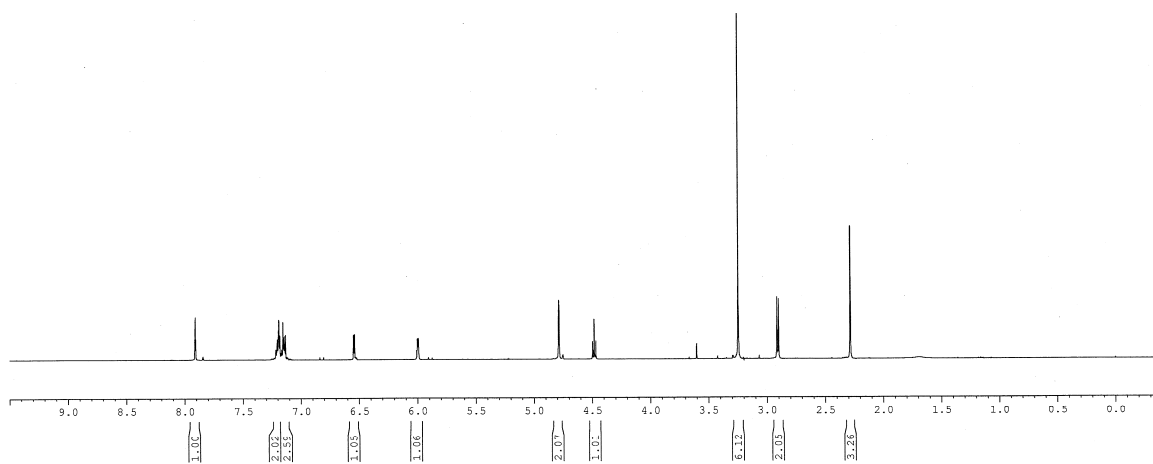

DY-1-271-12 (A)

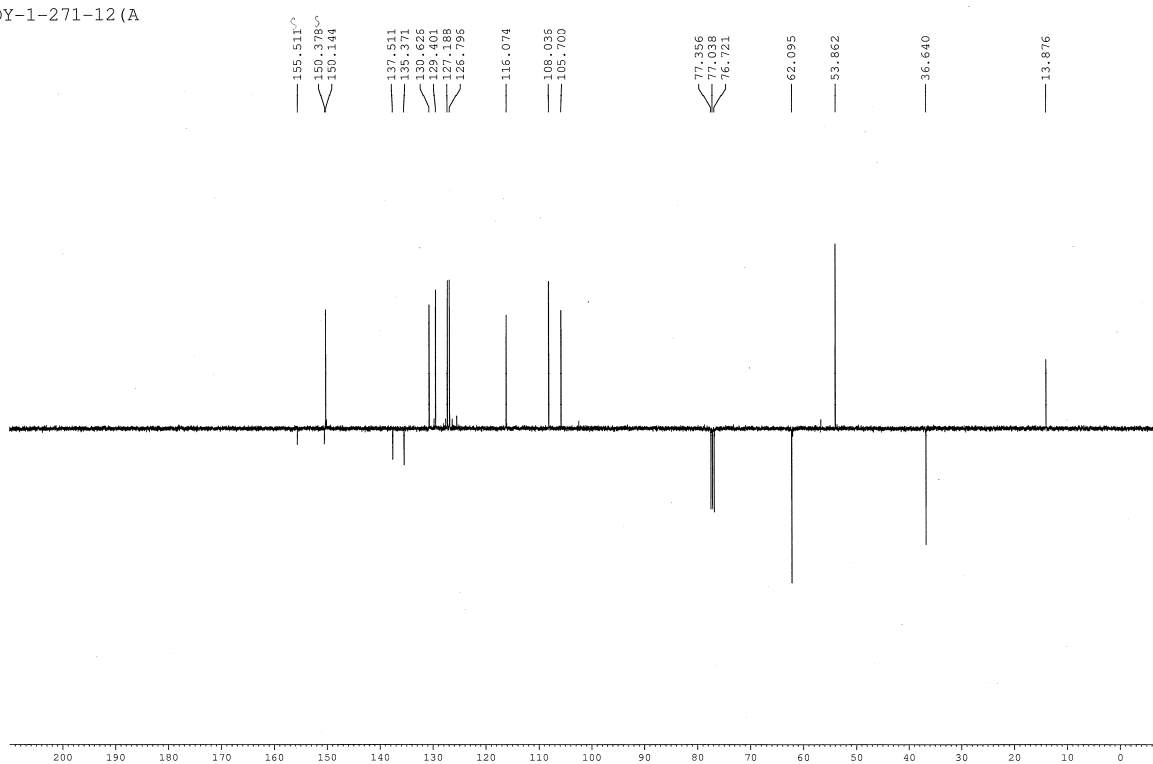

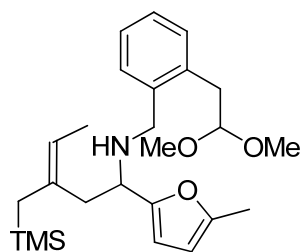

**27**  
DY-1-272

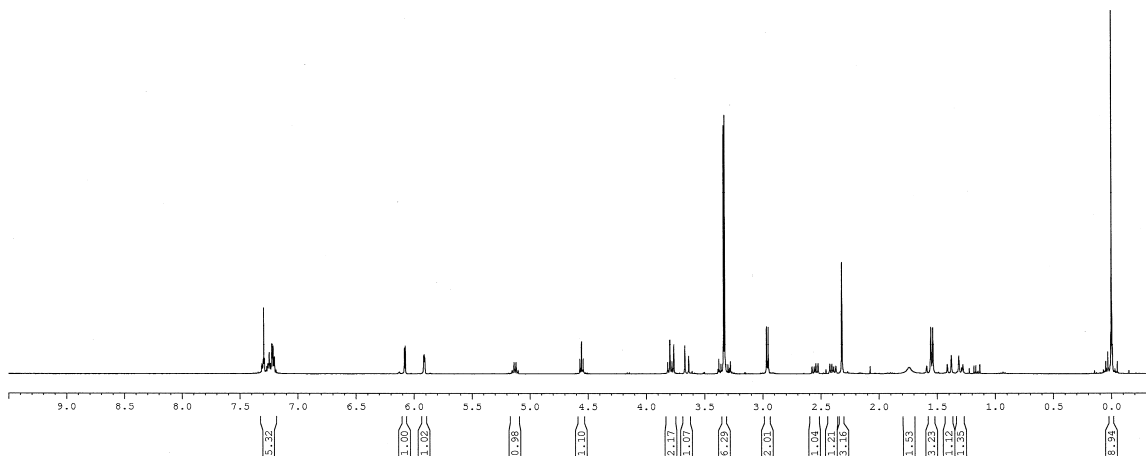

DY-1-272-4 (C)

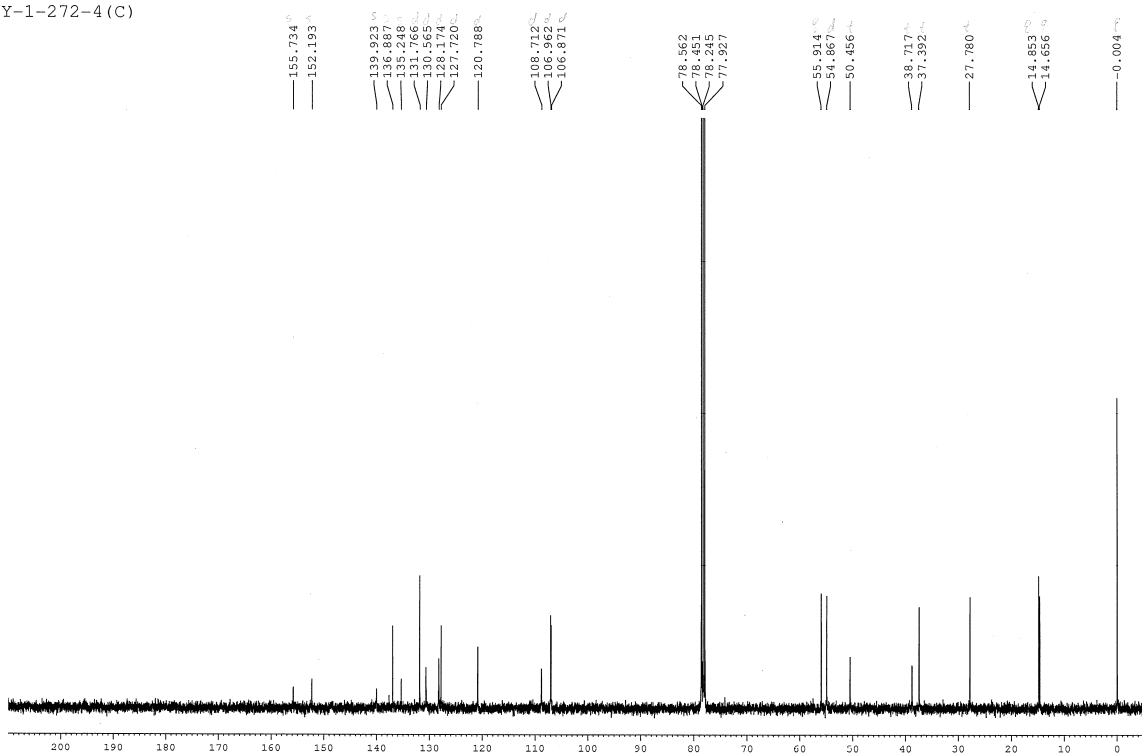

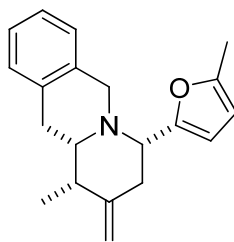

**28**  
DY-1-274

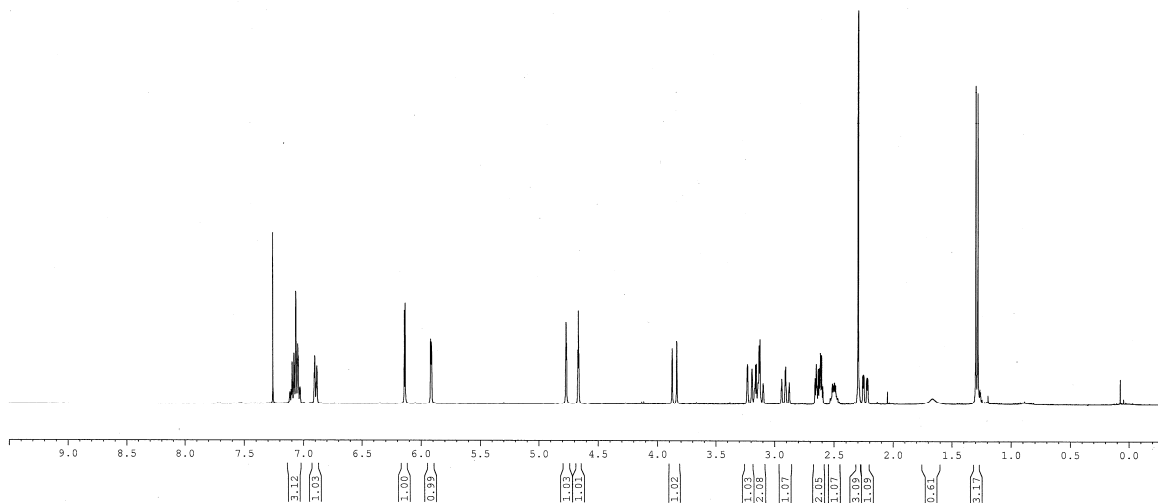

DY-1-274-4 (C)  
C13CPD

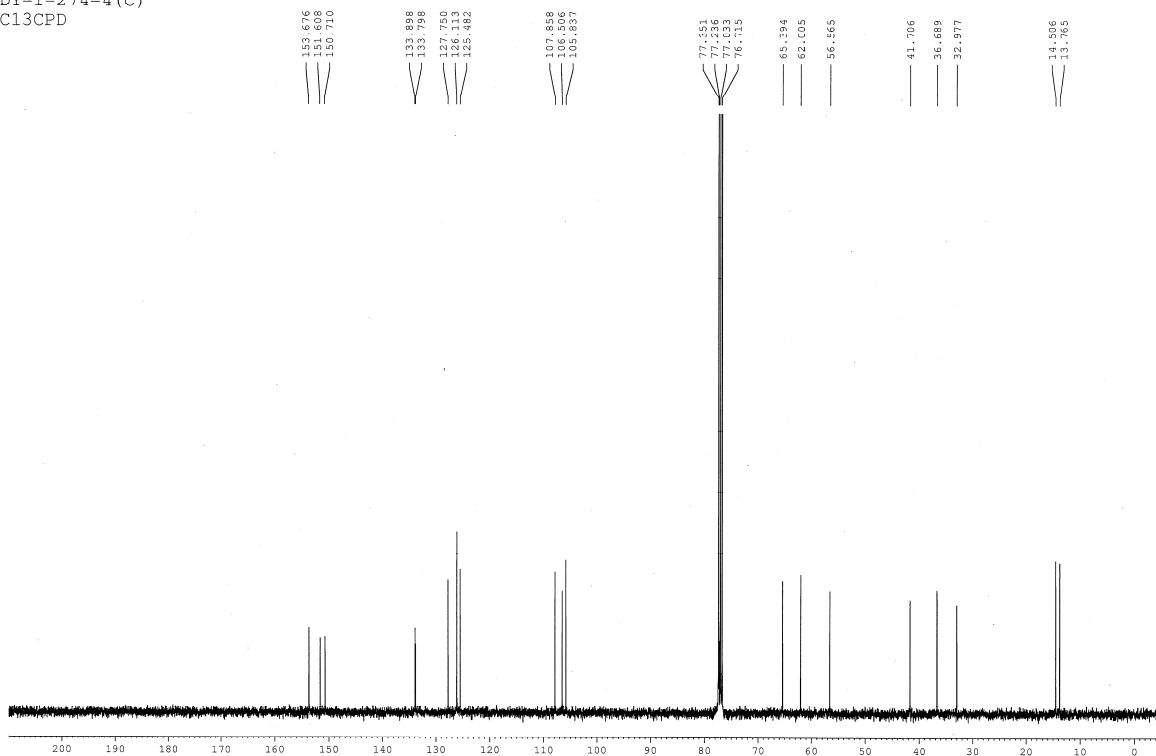

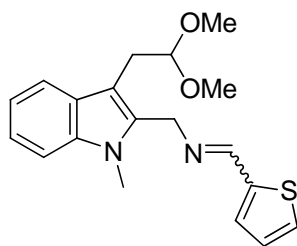

**29**  
DY-1-309

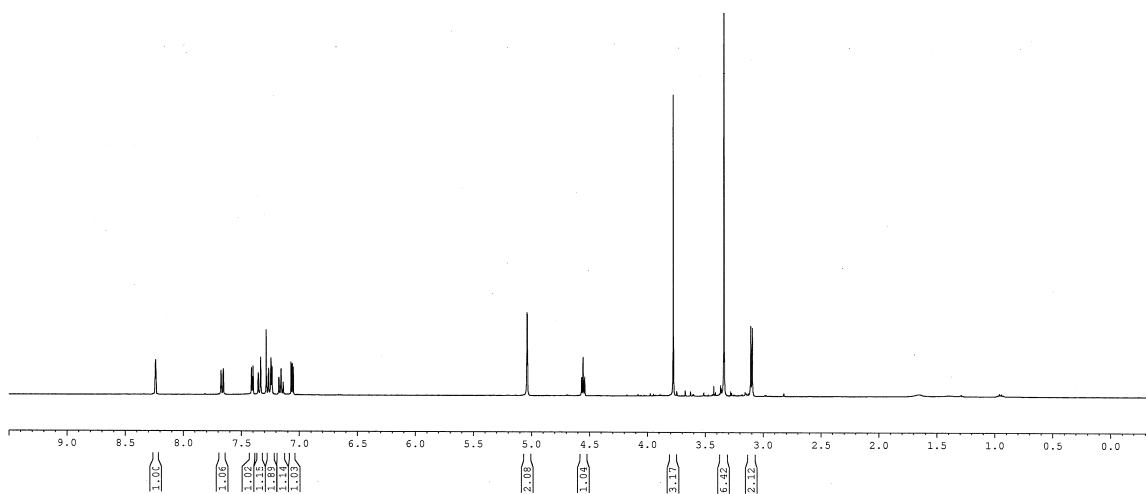

DY-1-309Final

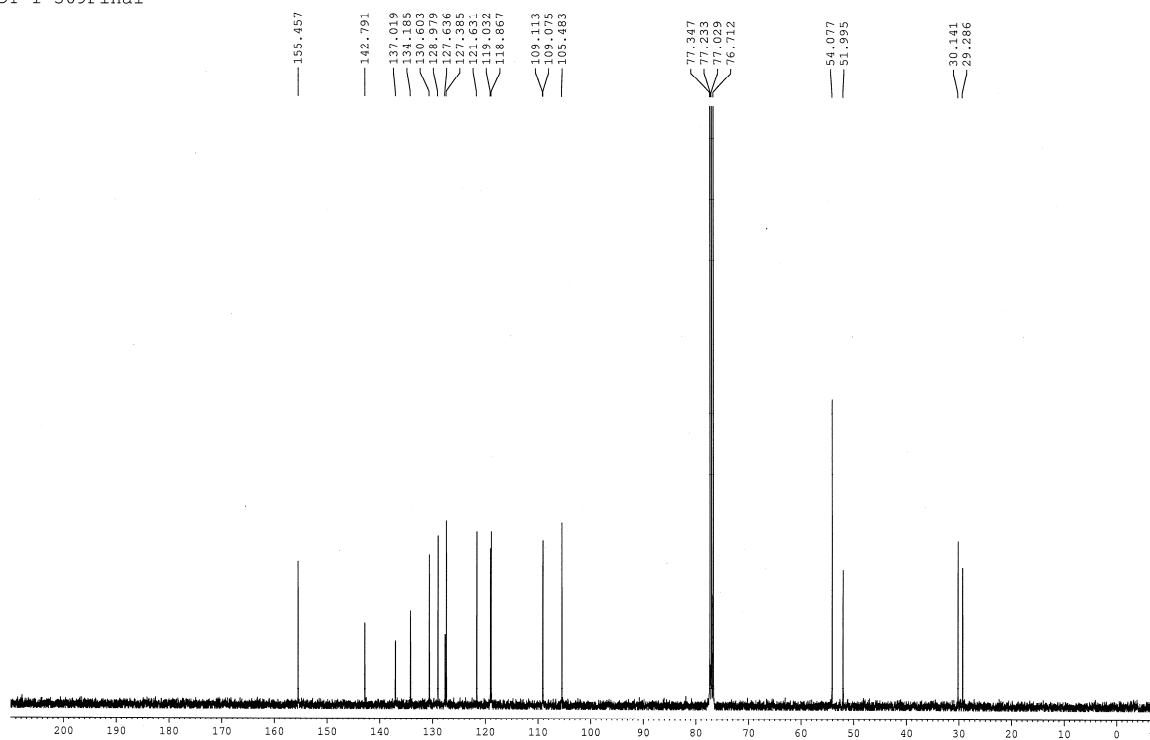

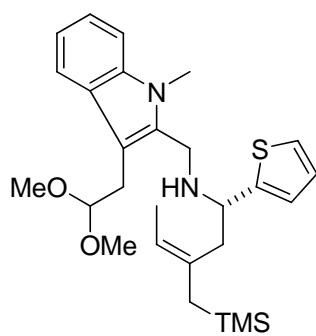

**30**  
DY-1-310

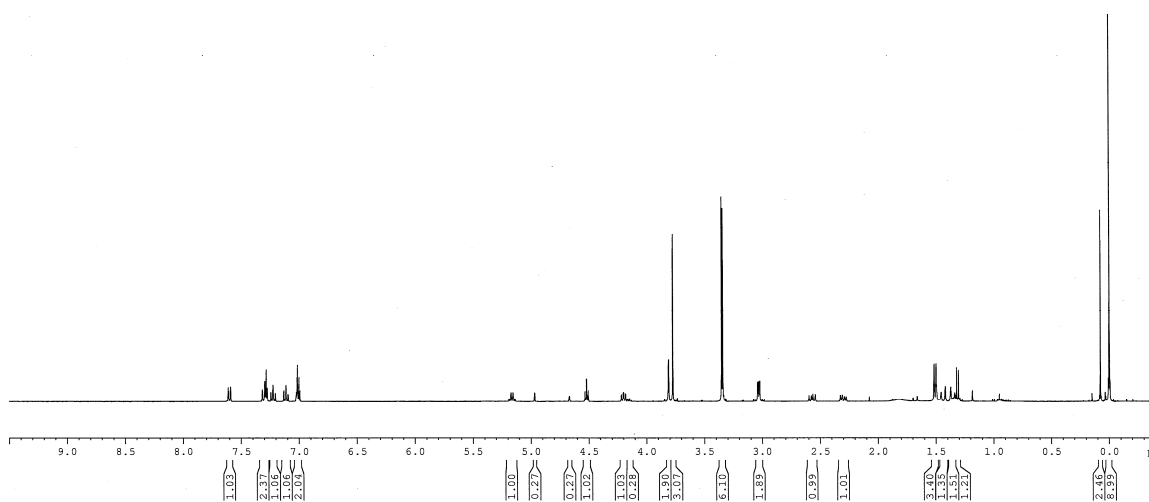

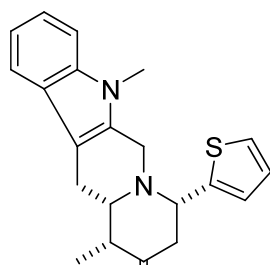

**31**  
**DY-2-1**

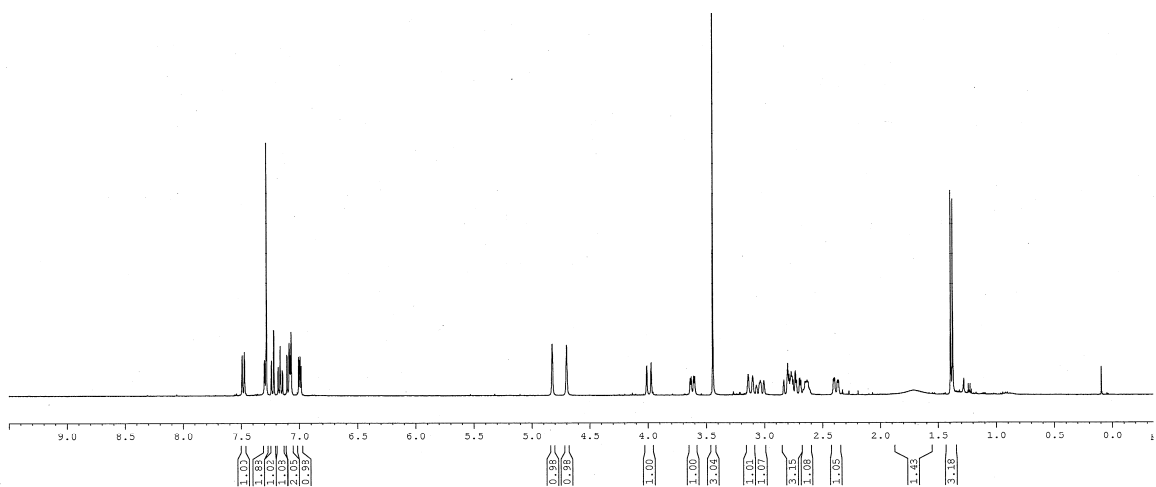

DY-2-1-13 (C)

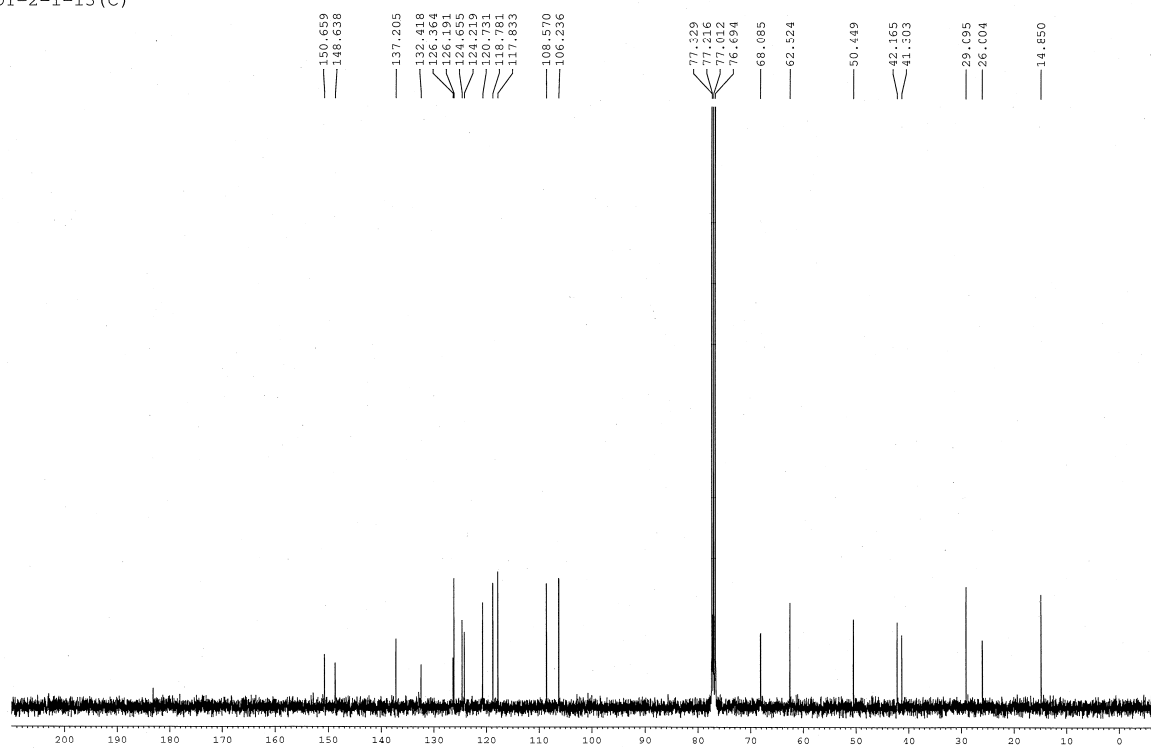

Supplement: Supplementary file 1 [file 4501828]
